# Supplementary material
Source: publisher site journal article supplement (https://static.cambridge.org/content/id/urn:cambridge.org:id:article:S1472380821000074/resource/name/S1472380821000074supp002.docx)
Supplement: Supplementary file 1 [file S1472380821000074supp002.docx]

**William Mahon: Public and Private Performances (1771-1814)**

October 23-25, 1771. Salisbury Festival, Assembly Rooms. October 24: Rehearsal of Handel’s Messiah, Guglielmi’s *La pazzie d’Orlando*, the orchestra led by Antonin Kammel from London other instrumentalists include Messrs. Mahon clarinetists [John and William Mahon]. October 25: “at the Assembly-room, in the evening, will be performed a MISCELLANEOUS CONCERT, consisting of several of the most capital Italian Songs; together with select pieces on the Violin, Violoncello, Hautboy, Clarinets, &c. &c.” “The principal instrumental parts by Mr. Kemmel, Signor Pasquali, Mr. Simson, Mr. Tewkesbury, Mess. Mahons, and others from London, Oxford, and Bath.”

*Salisbury Journal,* October 1771; *London Evening Post*, October 15-17, 1771; *General Evening Post*, October 17-19, 1771. Burrows and Dunhill, *Music and Theatre in Handel’s World*, 651.

July 7, 1773. Oxford. Radcliffe Infirmary. On Friday morning [July 9] the Academical Exercises in the Theatre will be continued, and the Celebrity closed in the Evening with a select Vocal and Instrumental Concert, consisting of favourite Songs by the principal voices; and solos, concertos, and other capital Pieces on the violin, hautboy, violoncello, French horn, bassoon, clarionets, &c. John and William Mahon.

*Oxford Journal*,June 5, 12, 26; July 3, 1773.

July 17, 1773. Oxford. The following is an accurate List of the Band of Music, engaged for the Oratorios, last week, in our Theatre. Instrumental Band. Mahon, 1st, Mahon 2d. [clarinets].

*Oxford Journal*,July 17, 1773.

December 8, 1773. Bath, New Upper Rooms. Fischer’s Concert. Overture with Clarinets, John and William Mahon.

*Bath Chronicle and Weekly Gazette*,December 2, 1773. James, “Concert Life in Eighteenth-century Bath,” 787-8.

November 10, 1774. Oxford. For the Benefit of Mr. Monro. On Thursday next will be performed, at the Music-Room in Holiwell, A Concert of Vocal and Instrumental Musick. Act I. Concerto. Hautboy. Mr. Mahon, jun.

*Oxford Journal*, November 5, 1774.

June 20, 1776. Oxford. Parish Church of St. Peter. For the Benefit of Mr. Cross, Jun., Organist of St. Peter’s Church in the East, on Thursday next. The Messiah, a sacred Oratorio. The principal Vocal Parts by Miss Mahon and Messrs. Norris and Mathews, with a full Chorus. The Instrumental Parts by Messrs. Malchair, Lates, Jackson, Mahons, Starkey, &c.

*Oxford Journal*, June 15, 1776.

July 31, 1776. Blandford, Assembly Room. Concert. J. C. Bach, Cecilia Grassi, Crosdill, William Cramer, John Mahon, William Mahon.

Weston, *Clarinet Virtuosi of the Past*, 259;Thomas, “John Mahon,” 5.

August 2, 1776, Cirencester, Oakley Wood House. Miss Mahon and Mr. Matthews, vocal, John and William Mahon, clarionets. Performance changed from July 31.

*Oxford Journal*, July 13, 1920, 26, 27, 1776; *Bath Chronicle and Weekly Gazette*, August 1, 1776.

December 11, 1776. Bath. Mr. Fischer’s Concert with be at the New Assembly-Rooms. Act. II. Overture with Clarionets, Bach. [Clarinets, John and William Mahon].

*Bath Chronicle and Weekly Gazette,* December 5, 1776.

July 23, 1777. Blandford. Concert of Vocal and Instrumental Music, at the Assembly-Room in Blandford, For the Benefit of Messrs. Mahon, from Oxford. The vocal parts by Miss Mahon; the first violin by Mr. Tewkesbury, with other capital performers from Oxford, Bath &c.

*Salisbury and Winchester Journal*, July 21, 1777.

August 8, 1777. Cirencester. The Annual Meeting at Oakley Wood House. Miss Mahon and Mr. Matthews, vocal, Clarionets by Messrs. Mahons (John and William Mahon).

Cirencester, Oakley Wood House.

*Oxford Journal*, July 19, 26, 31, 1777; August 2, 1777; *Bath Chronicle and Weekly Gazette,* July 31, 1777.

July 22, 1778. Oxford, Musick-Room. For the Benefit of Miss Mahon. Act I. Quintetto, Clarionets, Horns, and Bassoon, Between the Acts, a favourite Quintetto for Clarinets [John and William Mahon], Horns, and Bassoon. Act II. Concerto, Clarionet [Mr. Mahon].

*Oxford Journal*, July 18, 1778.

June 8, 1780. Salisbury [Sarum]. “On Thursday the 8th. The Dorset Militia happening to halt at Sarum, the concert was on that day instead of the week follow’g in order to take advantage of the celebrated Mahons being there & having assistance, the elder of whom played a clarinet concerto in a style that was then thought very little inferior to that of Fischers on the hautboy. . .”

*The John Marsh Journals*, 215.

January 10, 1782. Salisbury. We hear that on Thursday next (being the second Choral Night of our Subscription Concert this season) all true Lovers of Music will have an opportunity of being much entertained with a most selecte and elegant choice of pieces, performed by Mess. Tenducci, Rauzzini, Salomon, Mahons, &c. &c.

*Salisbury and Winchester Journal*, January 7, 1782.

January 10, 1782. Salisbury. “The day after this we had a very good Subscription Concert the Mahons being at it, & also Mess’rs Salomon Tenducci & Miss Storer a singer who all came over from Bath. . .”

*The John Marsh Journals*, 256.

February 26, 1783. Derby. Opera House, Derby. “[William] Mahon’s Clarionette was very capital.”

*Derby Mercury*, February 27, 1783.

September 24-26, 1783. Salisbury Annual Festival of Musick for which many of the first Performers, both Vocal and Instrumental (from London, Bath, Oxford, &c.) are engaged: Miss Mahon, Mr Cramer, Mr. Mahon (from Oxford), Mr. W. Mahon. On Wednesday and Friday Evenings, the 24th and 26th of September, will be performed, at the Assembly Room, Select Miscellaneous Concerts.

*British Evening Post*, September 2-4, 1783; *St. James’s Chronicle or the Evening Post,* September 1783.

May 27-29, 1784. Westminster-Abbey. Handel Commemoration Concerts. First Violins, Mr. J. Mahon, Oxford; Tenors, Mr. W. Mahon.

Burney, *An Account of the Musical Performances in Westminster-Abbey, and the Pantheon,* 17-18; *Commemoration of Handel. Third Performance, The Messiah*, 7-8. Concert Program, British Library, https://historicaltexts.jisc.ac.uk/.

June 3, 5, 1784. Pantheon. Handel Commemoration Concerts, First Violins, Mr. J. Mahon, Oxford; Tenors, Mr. W. Mahon.

Burney, *An Account of the Musical Performances in Westminster-Abbey, and the Pantheon*, 17-18.

June 22-24, 1784. Musick Room, Oxford. Handel’s L’Allegro ed Il Penseroso, and the Coronation Anthem, A Grand Miscellaneous Concerts (June 23-24). Vocal Performers, Madame Mara, Miss Mahon, Messrs. Norris, Matthews, Price. Principal Instrumental Performers, - Mr. Salomon, Mr. Crosdill, Mr. Malchair, Mr. Monro, Mr. Tibbett, Mr. Jackson, Mr. W. Mahon, Mr. James Mahon, &c.

*Oxford Journal*, June 19, 1784; *Reading Mercury*, June 21, 1784.

September 22-24, 1784. Salisbury Annual Musical Festival. Mr. Cramer, Mr. Fischer, Sig. Cerveto, Sig. Soderini, Garriboldi, Storace, Mr. Serjeant (the famous trumpet), Mr. W. Mahon, with various other capital hands, will form the principal instrumental part of the orchestra.

*Salisbury and Winchester Journal*, August 16, September 20, 1784; *St. James’s Chronicle or the British Evening Post*, July 29-31, 1784..

December 24, 1784. Bath, New Assembly Rooms. For the Benefit of Mr. Rauzini will be performed The Sacred Oratorio of the Messiah. Instrumental Performers, Clarionet, W. Mahon. With full Band and Chorusses.

*Bath Chronicle*, December 16, 23, 1784.

January 19, 1785. Bath. New Assembly-Rooms. Miss Cantelo’s Concert will be on Wednesday. Act I. Overture, Haydn. Quartetto, Clarionet, Mr. Mahon, Baumgarten.

*Bath Chronicle and Weekly Gazette*, January 13, 1785.

April 21, 1785. Oxford. For the Benefit of Mr. Cross, Organist, on Thursday will be performed in St. Martin’s Church, at the opening of the organ there, at Eleven o’Clock in the Forenoon, The Oratorio of Judas Maccabaeus, Composed by Mr. Handel. Principal Vocal Parts by Miss Mahon, The Instrumental Parts by Mess. Malchair, Mahon.

*Oxford Journal*, April 9, 1785.

July 20, 1785. Oxford. For the Benefit of Miss Mahon. On Wednesday will be performed at the Music-Room, Oxford. A Concert of Vocal and Instrumental Music. The Principal Vocal Parts by Miss Mahon, Miss Sarah Mahon, Mr. Norris, and Master Webb. The Instrumental by Messrs. Malchair, Jackson, Monro, &c and A Concerto on the Clarionet by Mr. W. Mahon.

*Oxford Journal*, July 16, 1785.

September 28-30, 1785. Salisbury Festival. The vocal parts by Madame Mara and “Miss Mahon from Oxford”. “Mr. Cramer, Mons. Mara (principal Violoncello) Signora Soderini and Gariboldi, Mr. Vinicombe (first Trumpet) Messrs. W. Mahon, Grant, Mr. Storace, Mr. Ashley (double Bassoon) Rogers, Cantelo, with various other capital Hands, will form the principal Instrumental Part of the Orchestra.”

*St. James's Chronicle or the British Evening Post*, August 30-September 1, 1785.

December 8, 1785. Oxford. For The Benefit of Miss Mahon, on Thursday next, At the Music Room, Oxford will be a Concert. The Vocal Parts by Miss Mahon, Mr. Norris, The Instrument by Mess. Malchair, With a Concerto on the Clarionet, by Mr. W. Mahon.

*Oxford Journal*, December 3, 1785.

March 14, 1786. Salisbury. For the Benefit of Mr. Parry. Will be performed at the Theatre, A Concerto. The first Violin by Mr. [William] Mahon. Between the Acts, a Song (with a Solo Accompaniment, for the Clarionet) by Miss Mahon. Act. II. Menalcas.—A Pastoral. The Music of the Hymn and Pastoral compiled from the best Masters, by the late James Harris, Esq. *Salisbury and Winchester Journal,* March 13, 1786.

May 31 and June 3, 1786. Grand Musical Handel Commemoration Festival. Westminster Abbey. John Mahon, violin and William Mahon, viola.

*Biographical Dictionary*, vol. 10 (1984), Concert programs, Gerald Coke Handel Collection, Foundling Museum, http://www.concertprogrammes.org.uk/html/search/verb/GetRecord/4772/

June 27, 1786. Oxford, Music Room. On Tuesday will be performed a Grand Concert. Principal Vocal Performers, Miss George, Miss Mahon, Instrumental Performers, viz. Messrs. Malchair, Tebet, W. Mahon.

*Oxford Journal*, June 24, 1786.

June 29, 1786. Oxford, Music Room. Same performance as June 28, 1786. Vocal Performers, Miss George, Miss Mahon, Instrumental Performers, viz. Messrs. Malchair, Tebet, W. Mahon.

*Oxford Journal*, July 1, 1786; *Hereford Journal*, July 6, 1786.

August 17, 1786. Reading, St. Lawrence’s Church, Oratorio of Messiah. Miss Mahon, Instrumentalists, Messrs. Ashley’s, Mahon.

*Reading Mercury*, August 21, 1786.

September 1786. Chester Music Festival. County-Hall. Music by Handel. L’Allegro, ed il Penseroso. Principal vocalists, Mr. Harrison, Mrs. Billington, Miss Mahon, Mr. Sale, Signor Rubinelli. Principal instrumentalists, Mr. Cramer, Mr. W. Mahon. Miscellaneous Act. Concerto Violin, Mr. Cramer. Song, Sacchini, Miss Mahon. Accompanied on the Clarionet by Mr. W. Mahon, Lieta quest’alma amante.

*L'Allegro, ed Il Penseroso. As it is to be performed in the County-Hall, in Chester. Set to Music by Mr. Handel*. 1786; Festival programme, British Library, https://historicaltexts.jisc.ac.uk/.

October 4-6, 1786. Salisbury Annual Festival of Musick. For which a compleat Band and Chorus are engaged. Principal Vocal Performers, The much-admired Sig. Rubinelli, Miss Mahon, Miss S. Mahon (chief Soprano), Messrs. Corfe. Principal Instrumental Performers, Mr. Cramer, Mr. Fischer, Mr. Smith (Violoncello from the Opera House), Signors Garriboldi and Storace, Mr. Ashley, with his four Sons, Messrs. W. Mahon, Grant, Rogers, Cantelo, James Mahon, Henry.

*Bath Chronicle and Weekly Gazette*, September 7, 1786; *Salisbury and Winchester Journal*, September 7, 11, 1786; *General Evening Post*, September 21-23, 1786.

November 1786 to March 1789. Cambridge. John, William, James, Elizabeth, Mary, Sarah Mahon. John, clarinet, William, violin (leader).

Weston, *Yesterday’s Clarinettists: a sequel*, 107.

February 22, 1787. Hanover Square, Madame Mara’s Concerts, Hanover Square Rooms. Concerto, clarinet, Mahon.

*Gazetteer and New Daily Advertiser*, February 24, 1787.

Review of February 22, 1787 Concert. The Mara Concert. Mahon’s concerto on the clarinet was much admired; his tone on the instrument is unequalled.

*Gazetteer and New Daily Advertiser*, February 24, 1787.

February 28, 1787. Free-Masons’-Hall. Readings and Music. On Wednesday Evening next, at Seven o’Clock. Air Miss S. Mahon (from Salisbury, her first appearance this Season.), accompanied on the Clarionet by Mr. Mahon. Part II. Solo on the Clarionet—Mr. W. Mahon.

*World and Fashionable Advertiser*, February 26, 28, 1787; *Morning Chronicle and London Advertiser*, February 26, 27, 28, 1787; *Public Advertiser*, February 28, 1787.

Review of February 28, 1787 Concert. Mr. Mahon performed a pleasing solo on the clarinet. *Morning Chronicle and London Advertiser*, March 2, 1787.

March 6, 1787. Hickford’s Rooms, Brewer-street, Golden-square. Readings and Music. To-morrow Evening, at Eight o’Clock. The Vocal Parts by Miss S. and Miss M. Mahon. First Violin, Mr. Mahon; Principal Second Violin, Mr. William Mahon; Principal Violoncello, Mr. Reinagle; Principal Bassoon, Mr. Parkinson. Part I. Solo Concerto Clarinet, Mr. Mahon. Part II. Concertanti for two violins and a Tenor Obligati, by Mess. Mahons and Reinagle (Davaux.). As Mr. Mahon has undertaken the Direction of the Orchestra, he will endeavor to make the Band as complete as possible, and to give a Variety of Ancient and Modern Music.

*Morning Chronicle and London Advertiser*, March 3, 1787; *Public Advertiser*, March 5, 1787; *World and Fashionable Advertiser*, March 3, 5, 1787.

March 22, 1787. London, Freemasons Hall. Readings and Music. On Thursday next, Grand Concerto Handel. Act I. Song, Miss S. Mahon. Solo Concerto Clarionet, Mr. Mahon. Act II. Concertanti for two Violins. Obligato, Mess. Mahons. Devaux. Song, Miss Mahon. The Orchestra under the Direction of Mr. Mahon.

*Public Advertiser*, March 12, 15, 1787.

July 23, 1787. Reading Festival. Miss S. Mahon, who is engaged as second principal at our festival, was much admired at several capital concerts in London, last winter, and particularly at Freemason’s Hall, where the original concert of antient music is performed. Mr. Mahon, whose abilities are so well known, is also added to our instrumental performers. The band is now complete and formed on so capital a scale, that the greatest musical effect may fairly be expected to be given to each of the performances.

*Reading Mercury*, July 23, 1787.

August 26-28, 1787. Salisbury Annual Festival of Music, for which a compleat Band is engaged. Principal Instrument performers, Mr. Cramer, Signor Sperati (Principal Violoncello), Signor Gariboldi, Signor Storace, Messrs. Ashley, W. Mahon, Calcott, L. Lavenu.

*Bath Chronicle and Weekly Gazette,* August 16, 1787; *General Evening Post*, August 21, 1787 - August 23, 1787.

September 19-20, 1787. Wells Music Meeting will be celebrated on Wednesday and Thursday. Principal Vocal Performers, Miss Cantelo, Miss. S. Mahon, Messrs. Corfe. Principal Instrumental Performers, Messrs. Brooks, Herschell, Smart, Ashley, W. Mahon.

*Bath Chronicle and Weekly Gazette*, August 23, 30, September 6, 13, 1787; *Felix Farley's Bristol Journal*, August 25, 1787.

September 26-28, 1787. Salisbury Annual Festival of Music, for which a compleat Band is engaged. Principal Instrumental performers, Mr. Cramer, Signor Sperati (Principal Violoncello), Signor Gariboldi, Signor Storace, Messrs. Ashley, W. Mahon, Calcott, L. Lavenu.

*Bath Chronicle and Weekly Gazette,* August 16, 1787; *General Evening Post*, August 21-23, 1787.

December 18, 1787. Salisbury. Mr. Goss’s Benefit. J. Goss most respectfully informs the Ladies and Gentlemen of the City, Close, and neighbourhood, that his Benefit Concert is fixed for Tuesday at Mr. Gierone’s Concert Room, at the Spread Eagle, at which will be performed a Miscellaneous Concert. The principal Performers.—The Master Gosses, Mess. Corfe, Parry Mahon, &c. &c.

*Salisbury and Winchester Journal*, December 10, 1787.

December 28, 1787. Salisbury. Mr. Wellman begs leave most respectfully to inform the Nobility, Gentry, and his friends in particular of Southampton and its vicinity, that a Miscellaneous Concert of Vocal and Instrument Music will be at the Dolphin Assembly-Room, on Friday evening. Principal Performers.—The much admired Miss Mahon, Mr. Corfe, Mr. Parry, Mr. Goss, Mr. Hill, Messrs. Mahon, Banks, &c. with various other capital hands from Salisbury, Winchester, and Portsmouth.

*Salisbury and Winchester Journal*, December 17, 1787.

January 18, 1788. Salisbury. Mr. Parry respectfully informs the public that his Benefit Concert will be at Mr. Gibbon’s Room on Friday next. Act I. Trio, Messrs. [William] Mahon, Banks, and Clarke —Pleyel; Act II. Trio Piano Forte (Haydn) Messrs. Mahon, Banks, and Parry.

*Salisbury and Winchester Journal*, January 14, 1788.

March 11, 1788. Salisbury, For the Benefit of Mr. Mahon. At the Theatre, There will be a Grand Concert of Vocal and Instrumental Music. Act. II. Introductory Overture, Menalcas; Act III. Concerto Clarionet, Mr. Mahon.

*Salisbury and Winchester Journal*, March 10, 1788.

June 9, 1788, Blandford. For the Benefit of Mr. James Mahon, on Monday the 9th of June, 1788, at the Assembly Room in Blandford, there will be a Concerto of Vocal and Instrumental Music. The principal Vocal Parts by Miss Mahon, Mr. James Mahon, &c. The First Violin, and a Concerto on the Clarionet, by Mr. William Mahon; and a Concerto on the Violin by Mr. Richard Kelly, jun.

*Salisbury and Winchester Journal*, June 2, 9, 1788.

July 22, 1788. Blandford Concert. On Tuesday at the Assembly-Room, Blandford, there will be a Grand Concert of Vocal and Instrumental Music. The principal Vocal Parts by Mrs. Ambrose, Miss Mahon, Messrs. Corfe, Boss, Clark, and James Mahon. The Instrumental Band will be well supported, by Performers from London, Salisbury, Winchester, &c. &c. Under the Direction of Mr. W. Mahon [violin].

*Salisbury and Winchester Journal*, July 21, 1788.

September 10-12, 1788. Hampshire Music Meeting, 1788, Will be held at Winchester. Vocal Performers already engaged, Mrs. Billington, Mr. Norris, from Oxford, Mr. Parry. The Band to be led by Mr. Salomon, First Hautboy, Mr. Fischer, William Mahon, Rogers, Attwood, James Mahon, Cantelo.

*The World and Fashionable Advertiser*, August 23, 1788, September 4, 1788; *Hampshire Chronicle*, September 1, 1788; *Salisbury and Winchester Journal*, August 25, September 1, 8, 1788; *Morning Post and Advertiser*, September 4, 1788; *St. James’s Chronicle of the British Evening Post*, August 21-23, September 4-6, 1788; *Reading Mercury*, September 8, 1788; *Times,* September 15, 1788.

Review of September 10-12, 1788. Hampshire Music Meeting. The band to be led by Mr. Salomon. William Mahon, and John Mahon. Fifth and last performance. Miscellaneous Concert. Reinagle and Mahon distinguished themselves—the first, by a Solo on the Violoncello—and the second by a Concerto on the Clarinet.

*Hampshire Chronicle*, September 1, 1788.

September 17-19, 1788. Salisbury Annual Festival of Music. Principal Instrumental, Mr. Cramer, Sig. Sperati (principal Violoncello), Mr. Parke (first Hautboy), Mr. Billington (principal Double Bass), Messrs. Sykes, W. and J. Mahon. Under the direction of Mr. Corfe.

*Salisbury and Winchester Journal*, September 1, 8, 1788.

September 24-26, 1788. Norwich Grand Musical Festival. At St. Peter’s Mancroft, on Wednesday Morning will be performed The Sacred Oratorio of The Messiah. In the Evening, at the New-Hall, St. Andrew’s, A Grand Miscellaneous Concert. On Thursday Morning, the 25th, at St. Peter’s Church, A Selection for the Works of Handel and Haydn. At St. Andrew’s New-Hall, in the Evening, A Miscellaneous Concert. On Friday the 26th in the morning, at St. Peter’s, The Sacred Oratorio of Judas Maccabaeus. The Principal Vocal Performers already engaged are, Madame Mara (Being last time of her performing in England), Mrs. Ambrose. The Principal Instrumental Performers are, Mr. Cramer, leader of the band; Mr. Mahon, second violin, Mr. [Wm.] Mahon, clarinet.

*Bury and Norwich Post,* June 4, 7, 11, 18, 21, July 2, 19, 23, August 30, September 3, 10, 20, 23, 1788; *The Ipswich Journal*, June 14, 21, 1788;August 30, 1788; *Norfolk Chronicle*, May 31; June 7, 14, 18, 28, July 19, August 2, 16, 1788; *Times*, August 28, 1788; *Hampshire Chronicle,* July 7, 1788; *London Chronicle*, September 27-30, 1788.

October 1, 1788. Salisbury, Weymouth Hotel, Mrs. Warton’s Concert on Wednesday next will be a grand Concert of Vocal and Instrumental Music. The Vocal Parts by Mrs. Warton and Mr. James Mahon. The First Violin (and a Concerto on the Clarionet) by Mr. [William] Mahon; the rest of the Instrumental Band by Performers from Bath, Salisbury, &c. &c. The particulars will be given in due time. The Concert to begin at seven o’clock.

*Salisbury and Winchester Journal*, September 29, 1788.

Review of October 1, 1788. Mr. [William] Mahon’s concerto on the clarionet was also received with raptures by the amateurs of the science; and the trio “Concertante Obligate,” by Messrs. Mahon, Lavenu, and Sibley, was admirably well executed.

*Salisbury and Winchester Journal*, October 6, 1788.

October 15, 1788. Crown and Anchor Tavern. Anacreontic Society Concert. First Concert. Concerto for clarinet and bassoon played by [Wm.] Mahon and Parkinson.

*Morning Chronicle and London Advertiser*, October 17, 1788.

Review of October 15, 1788 Concert. A concerto on the clarinet and bassoon, gave also much pleasure, for which our thanks are due to Mahon and Parkinson.

*Morning Chronicle and London Advertiser*, October 17, 1788.

October 16, 1788. Wells, Concert. Clarionet, [William] Mahon.

*Bath Chronicle and Weekly Gazette*, October 16, 1788. James, “Concert Life in Eighteenth-Century Bath,” 789.

November 5, 1788. Bath, New Assembly-Rooms, Subscription Concert. There will be eight concerts. To begin Wednesday. Principal Vocal Performers. Miss Cantelo, Mr. Incledon. Instrumental Performers. First Violin, Mr. Brooks, Violoncello, Mr. Herschell, Oboe, Mr. Ashley, Flute, Mr. Florio, from London, Clarionet, Mr. Mahon.

*Bath Chronicle and Weekly Gazette*, October 16, 23, 30, 1788.

November 12, 1788. Bath, New Assembly-Rooms. Second Subscription Concert. Israel in Egypt. Act II. Duet, The Lord is a Man of war, Messrs. Russell, Mahon from Oxford, and [James] Mahon from Oxford.

*Bath Chronicle and Weekly Gazette,* November 5, 6, 7, 9, 1788.

November 19, 1788. Bath, New Assembly-Rooms. Third Subscription Concert. Clarionet, Mr. Mahon.

*Bath Chronicle and Weekly Gazette,* November 13, 20, 1788.

November 26, 1788. Bath, New Assembly-Rooms. Fourth Subscription Concert. Clarionet, Mr. Mahon.

*Bath Chronicle and Weekly Gazette,* November 27, 1788.

December 10, 1788. Bath, New Assembly Rooms. The Fifth Subscription Concert will be on Wednesday. Clarionet, Mr. Mahon.

*Bath Chronicle*, December 4, 11, 1788.

December 17, 1788. Bath. New Assembly-Rooms. The Sixth Subscription Concert will be on Wednesday in the Great Room. Act. I. Concerto Clarinetto, Mr. Mahon.

*Bath Chronicle and Weekly Gazette*, December 18, 1788.

December 24, 1788. Bath. New Assembly-Rooms. For the Benefit of Mr. Rauzzini, will be performed the Sacred Oratorio of The Messiah. Instrument Performers Mahon.

*Bath Chronicle and Weekly Gazette,* December 11, 18, 1788.

December 31, 1788. Bath. New Assembly Rooms. The Seventh Subscription Concert. Act 1, Concerto Clarinetto, Mr. Mahon.

*Bath Chronicle and Weekly Gazette*, December 25, 1788; January 1, 1789.

April 13, 1789. Ranelagh House will be opened on Monday with A Concert of Vocal and Instrumental Music. Act II. Concerto, Clarinet, Mr. [Wm.] Mahon.

*World*, April 6, 8, 10, 13, 1789; *Diary or Woodfall’s Register*, April 9, 11, 13, 1789; *Morning Post and Daily Advertiser*, April 9, 1789; *Gazetteer and New Daily Advertiser*, April 11, 13, 1789; *Public Advertiser*, April 7, 9, 11, 1789; *Times*, April 6, 10, 13, 1789; Taylor, *Music in London*, 96.

June 9, 1789. Blandford. Concert of Music. For the Benefit of the Dorset Band. On Tuesday next at the Assembly Room, Blandford, will be a grand Concert of Vocal and Instrumental Music. The principal vocal Parts by Miss Biggs, Miss A. Biggs, Messrs. Mahon, Goss (from Salisbury) and Ryalls. The principal Instrumental Parts by Messrs. Mahons, Kerley, &c. &c.

*Salisbury and Winchester Journal*, June 8, 1789.

July 21, 1789. Blandford. Concert of Music. On Tuesday (being the first day of Blandford Races) there will be a Grand Concert of Vocal and Instrumental Music.—The principal vocal parts by Miss Mahon, Messrs. Corfe, Goss, Clark, and James Mahon. Under the Direction of Wm. Mahon [violin].

*Salisbury and Winchester Journal*, July 13, 1789.

August 5-7, 1789. Somerset Music Meeting will be celebrated at the Cathedral at Wells, under the direction of Mr. Rauzzini. Principal vocal performers, Mr. Harrison, Jr. J. Mahon. Instrumental performers, Messrs. Brooks (leader of the band), Herschel, Ashley and Sons, from London, W. Mahon. The Sacred Oratorio of the Messiah.

*Sherborne Mercury*, July 27, 1789; *Bath Chronicle and Weekly Gazette*, July 23, 30, 1789.

Reviews of August 5-7, 1789, Somerset Music Meeting at Wells. “The Music Meeting at this place commenced on Wednesday last [August 5]. The principal performers were Mr. Harrison, W. Mahon, Miss Cantelo, and Storace. The performance was under the direction of Rauzzini. The band was excellent. Brookes, of Bath, was the leader.” “The company were elegant and numerous, and the music went off with great eclat.”

*Diary or Woodfall's Register*, August 12, 1789; *Bath Chronicle and Weekly Gazette*, August 13, 1789.

September 30-October 2, 1789. Salisbury Annual Festival of Music. Principal Vocal Performers. Mrs. Billington, Miss Mahon, Messrs. Corfe, Parry, J. Mahon, Barthelman, Goss, Hill, Barrett, &c. &c. Principal Instrumental. Mr. Brooks, Sig. Sperati (principal Violoncello), Mr. Parkinson (Bassoon), Mr. Billington (principal Double Bass), Messrs. Sykes, W. Mahon, Calcott.

*The Bath Chronicle,* September 10, 1789; *Salisbury and Winchester Journal*, September 21, 1789; Lysons, *History*, 229.

October 7-9, 1789. Hampshire Music Meeting, 1789. Will be held at Winchester for which the most eminent Performers are engaged. The Band to be led by Mr. Salomon, First Hautboy, Mr. Fischer, Principal Violoncello, Mr. Reinagle, Principal Double Bass, Mr. Billington; Messrs. W. Mahon, Rogers, Sibley, J[ames] Mahon.

*Reading Mercury*, September 21, 1789; *Hampshire Chronicle*, October 5, 1789; *St. James’s Chronicle or the British Evening Post*, September 22-24, September 29-October 1, 1789; *World*, September 22, 1789.

November 11, 1789. Bath, Subscription Concert. There will be Eight Concerts. One Act consist of Antient and the other of Modern Musick—In each concert will be introduced some of the favourite Chorusses of Handel. Principal Vocal Performers, Miss Cantelo, Mr. Incledon, and Mr. J[ames] Mahon. Principal Instrumental Performers, Clarionet, Mr. Mahon.

*Bath Chronicle and Weekly Gazette*, October 29, 1789.

Review of November 18, 1789. Bath, Wednesday, Second Subscription Concert. New Rooms. In the second act Miss Mahon sang “The Prince unable to conceal his Pain” from the Alexander’s Feast of Handel: the chaste sentiment of the composition was delicately administered. First Violin, Brookes. Violoncello, Herschel. Clarinet, Mahon.

*Oracle Bell’s New World,* November 24, 1789; *Bath Chronicle and Weekly Gazette*, November 29, 1789; James, “Concert Life in Eighteenth-Century Bath,” 789-90.

November 25, 1789. Bath. New Assembly-Rooms. Mr. Harrison’s First Performance will be Wednesday Evening. Third Subscription Concert. Principal Vocal Performers, Miss Cantelo, Mr. Incledon, and Mr. J[ames] Mahon. Principal Instrumental Performers, Clarionet, Mr. Mahon.

*Bath Chronicle and Weekly Gazette*, November 26, 1789.

December 16, 1789. Bath, New Assembly-Rooms. The Fifth Subscription Concert will be on Wednesday. In the Great Room. Principal Vocal Performers. Miss Cantelo, Mr. J[ames] Mahon. Clarionet, Mr. Mahon. Quartetto, Clarionetto, Bassoon, Tenor, and Violoncello, Messrs. Mahon, Holmes, Rogers, and Herschell, Stamitz.

*Bath Chronicle and Weekly Gazette*, December 17, 1789.

December 24, 1789. Bath. New Assembly-Rooms. For the Benefit of Mr. Rauzzini, will be performed The Sacred Oratorio of The Messiah, Clarionet, Mr. Mahon.

*Bath Chronicle and Weekly Gazette,* December 17; December 24, 1789; *Felix Farley’s Bristol Journal*, December 19, 1789.

December 30, 1789. Bath. New Assembly Rooms. The Sixth Subscription Concert. Clarionet, Mr. Mahon.

*Bath Chronicle and Weekly Gazette,* December 31, 1789.

February 19, 1790. Oratorios and Selections from the Works of Handel, On the Wednesdays and Fridays during Lent. Theatre-Royal, Covent-Garden. Will be performed the Coronation Anthem, God Save the King. After which the Sacred Oratorio of The Messiah. On February 24, will be performed the first grand selection From the Performances in Westminster Abbey. Principal Singers, Miss Mahon. Among the Principal Instrumental Performers are Mr. Sperati, Mr. Mahon. The Band will consist of One Hundred and Fifty Performers.

*Public Advertiser*, February 9, 13, 17, 19, 1790; *Times,* February 19, 22, 1790.

February 24, 1790. Oratorios and Selections from the Works of Handel, On the Wednesdays and Fridays during Lent. Theatre-Royal, Covent-Garden. Will be performed the Coronation Anthem, God Save the King. After which the Sacred Oratorio of The Messiah. On February 24, will be performed the first grand selection From the Performances in Westminster Abbey. Principal Singers, Miss Mahon. Among the Principal Instrumental Performers are Mr. Mahon. The Band will consist of One Hundred and Fifty Performers.

*Public Advertiser*, February 23, 1790; *Times*, February 22, 24, 1790; Concert Program, British Library, https://historicaltexts.jisc.ac.uk/.

February 26, 1790. At the Theatre Royal, Covent Garden. This Day will be performed the Second Grand Selection of Sacred Music, From the Performances in Westminster Abbey. Principal singer, Miss Mahon; amongst the Instrumental Performers are Mr. Mahon [violin].

*Public Advertiser*, February 26, 1790.

March 3, 1790. Theatre-Royal, Covent-Garden, on Wednesday next, Will be performed. A Third Grand Selection of Sacred Music. Principal Singers, Miss Mahon. Among the Instrumental Performers are Mr. Mahon [clarinet].

*Times*, March 1, 3, 1790; *Public Advertiser*, March 2, 3, 1790.

March 10, 1790. Theatre-Royal, Covent-Garden, On Wednesday. Will by (Particular Desire) be repeated, for the last time this season, The First Grand Selection. From the Performances in Westminster-Abbey. Principal Singers, Miss Mahon. Among the Instrumental Performers are Mr. Mahon [violin].

*Times*, March 8, 1790; *Public Advertiser*, March 9, 10, 1790.

March 12, 1790. By Particular Desire, (And for the last Time this Season) At Play-House Prices. Theatre-Royal, Covent-Garden, To-Morrow, Friday, March 12, 1790. The Sacred Oratorio of The Messiah. Principal Singers, Miss Mahon. Among the Instrumental Performers are Mr. Mahon [violin].

*Times*, March 11, 1790.

March 17, 1790. A Fourth Grand Selection of Sacred Music, From the Performances in Westminster Abbey. Principal Singers, Miss Mahon. Among the instrumental performers are Mr. Mahon [violin].

*Times*, March 15, 17, 1790. Concert Program, British Library, https://historicaltexts.jisc.ac.uk/.

March 24, 1790. At the Theatre-Royal, Covent-Garden. The Favorite Grand Selection of Sacred Music. Among the Instrumental Performers are, Mr. G. Ashley, Mr [J.] Mahon (violin).

Concert Program, British Library, https://historicaltexts.jisc.ac.uk/.

March 25, 1790. London, Theatre Royal Covent Garden. Alexander’s Feast. Among the Instrumental Performers are Messrs. Ashley and Sons, Patria, Mahon (violin).

Concert Program, British Library, https://historicaltexts.jisc.ac.uk/.

April 5, 1790. London, Apollo Gardens, St. George’s Fields. The Nobility and Gentry are respectfully informed, that on account of the great additions and alternations carrying on at the above place, it will not be opened any more until the commencement of the ensuing Season, which is fixed for Monday the 5th of April next. Subscriptions and to the institution and Orchestra are now taken in at the Gardens, at 3l. 3s. for the whole season, which entitles a Subscriber to the refreshment of Tea every evening of their musical practices, which they will be enabled to pursue with uncommon advantage and delight, under the immediate direction of some of the first Performers in the Profession, viz. Messrs. Renegale and Mahon, Violoncello and Clarinet, &c.

*World,* March 25, 1790.

May 2, 1790. London, Spring Gardens. “From hence I walked over to Kensington to dinner & walked back with Mr. Harvest & my brother William, & drank tea at Spring Gardens Coffee House, where I met Mr. W. Mahon whom I had frequently met with at Sarum, who now by his clarinet & fiddle playing managed to pick up his clear guinea a day during the winter & spring seasons, w’ch it seems he used to spend as fast as he got it.”

*The John Marsh Journals*, 472.

August 25, 1790. Birmingham Musical Festival, for the Benefit of the General Hospital.

Principal instrument performers, Mahon.

*Oxford Journal*, August 14, 21, 1790.

September 24, 1790. Hampshire Music Meeting, 1790, will be held at Winchester. Principal Instrumental, Mr. Mahon.

*Hampshire Chronicle*, September 20, 1790.

October 14-15, 1790. Sheffield Music Meeting, 1790. Grand Miscellaneous Concerts. Principal second violin and clarionet, Mr. Mahon.

*Sheffield Register, Yorkshire Derbyshire & Nottinghamshire Universal Advertiser*, October 8, 1790.

November 10, 1790. Bath. Subscription Concerts. There will be Eight Concerts, and alternately will be introduced some of the favourite Songs and Chorusses of Handel. To begin on Wednesday. Clarionet, Mr. Mahon.

*Bath Chronicle and Weekly Gazette*, October 28; November 4, 11, 1790.

November 24, 1790. Bath. Subscription Concerts. The Third Subscription Concert will be on Wednesday. Clarionet, Mr. Mahon. Act I Quartetto, Violin, Violoncello, Clarionet, and Bassoon, Messrs. Brooks, Herschell, Mahon, and Holmes.

*Bath Chronicle and Weekly Gazette*, November 18, 25, 1790.

December 1, 1790. Bath, New Assembly-Rooms. The Fourth Subscription Concert will be on Wednesday. Principal Vocal Performers, Madame Mara. Clarionet, Mr. Mahon.

*Bath Chronicle and Weekly Gazette*, December 2, 1790.

December 8, 1790. Bath, New Assembly Rooms, in the Great Room. Madame Mara most respectfully informs the publick, that her Benefit Concert is fixed for Wednesday. Act II. Concertante, Clarionet and Bassoon, Messrs. Mahon and Holmes.

*Bath Chronicle and Weekly Gazette*, December 2, 1790.

December 9, 1790. Bath, Pauper Charity, for medical and chirurgical assistance for the Poor, Supported by Voluntary Contributions. A Concert of Sacred Musick. Madame Mara has generously offered her Assistance. Principal Instrumental Performers, Messrs. Brooks, Mahon, Herschell, Renagle.

*Bath Chronicle,* December 2, 1790.

December 15, 1790. Bath, New Assembly-Rooms. The Fifth Subscription Concert will be Wednesday. Clarionet, Mr. Mahon. Act I. Concertante, Clarionet, and Bassoon,

*Bath Chronicle and Weekly Gazette*, December 16, 1790.

December 29, 1790. Bath, New Assembly-Rooms. The Seventh Subscription Concert will be on Wednesday. Principal Instrumental performers, Clarionet, Mr. Mahon.

*Bath Chronicle and Weekly Gazette*, December 23, 1790.

March 4, 1791, continued for private benefit concerts until May 24. Dublin, Rotunda. Dr. Doyle’s eight subscription concerts. Musicians: Hamon (clarinet), [John] Mahon (violin); [William] Mahoon (clarinet). Dublin, Rotunda. Act 1: Duet, Viol and violoncello by Reinagle and [John] Mahon.

Greene, *Theatre in Dublin, 1745-1820*, vol. 4, 2624-5; 269 (epub).

March 11, 1791. Covent-Garden Theatre, Oratorio. Among the Instrumental Performers are, Messrs. Ashley and Sons, [W.] Mahon (violin), J. Mahon, clarinet [probably an error].

Concert Program, British Library, https://historicaltexts.jisc.ac.uk/; *A Biographical Dictionary*, vol. 10, 59.

March 16, 1791. Theatre Royal, Covent Garden. Messiah. Among the Instrumental Performers are, Messrs. Ashley and Sons, [W.] Mahon (violin), J. Mahon (clarinet) [probably an error].

Concert Program, British Library, https://historicaltexts.jisc.ac.uk/.

March 18, 1791. Theatre-Royal, Covent Garden, L’Allegro il Penseroso. Among the Instrument Performers are Messrs. Ashley and Sons, Billington, [W.] Mahon (violin), J. Mahon (clarinet) [probably an error]. Concert Program, British Library, https://historicaltexts.jisc.ac.uk/.

March 21, 1791. Professional Concerts. Hanover Square Rooms. Seventh Concert. Rauzzini, Song for voice, violin, cello, horn and clarinet, Messrs. Cramer, Smith, Pieltain, and Mahon, [by] Rauzzini; Concerto for two basset horns [Corni Bassiter by] Sig. Lazzarini, Dworsack [Franz Dvořák] and Vincent Springer, basset horns.

*Diary, or Woodfall’s Register*, March 21, 1791; *Morning Post and Daily Advertiser*, March 21, 1791; *Times,* March 21, 1791; *World*, March 21, 1791.

March 23, 1791. Theatre Royal, Covent Garden. Among the Instrumental Performers are: Messrs. Ashley and Sons, [W.] Mahon [probably an error] (violin), J. Mahon (clarinet) [probably an error].

Concert Program, British Library, https://historicaltexts.jisc.ac.uk/.

March 30, 1791. Theatre Royal, Covent Garden. Among the Instrumental Performers, Messrs. Ashley and Sons, Patria, [W.] Mahon (violin), J. Mahon (clarinet) [probably an error].

Concert Program, British Library, https://historicaltexts.jisc.ac.uk/.

April 1, 1791, Theatre Royal, Covent Garden. Among the Instrumental Performers are Messrs. Ashley and Sons, [Wm.] Mahon (violin), J. Mahon [probably an error].

Concert Program, British Library, https://historicaltexts.jisc.ac.uk/.

April 6, 1791. Theatre Royal, Covent (By Particular Desire) will be repeated L’Allegro, ed Il Pensieroso. Among the Instrumental Performers are Messrs. Ashley and Sons, [Wm.] Mahon, J. Mahon [probably an error].

Concert Program, British Library, https://historicaltexts.jisc.ac.uk/.

April 14, 1791. Bath. Passiontide Concert. Clarionet, Mr. Mahon

*Bath Chronicle*, April 14, 1791.James, “Concert Life in Eighteenth-Century Bath,” 788.

April 19, 23, 1791. Bath, New Assembly-Rooms. Mr. Rauzzini most respectfully informs the publick, that there will be two subscription concerts in Passion Week. The First will be on Tuesday April the 19th, and the Second on Saturday April the 23d. Principal Vocal Performers, Made Mara, Principal Instrumental Performers, Clarinet, Mr. Mahon.

*Bath Chronicle and Weekly Advertiser*, April 14, 1791; James, “Concert Life in Eighteenth-Century Bath,” 788, 790.

April 25, 1791. Professional Concerts, Hanover Square Rooms. Eleventh performance. Part II. Concerto for clarinet and bassoon, Mahon, J. Parkinson.

*Morning Post and Daily Advertiser*, April 25, 1791; *Oracle*, April 25, 1791.

May 16, 1791. Apollo Gardens, St. George’s Fields. Grand Miscellaneous Concert of Vocal and Instrumental Music. Presented by Mr. Clagget. Vocal performers, James Mahon; Instrumental performers, including [Wm.] Mahon.

*World*, May 16, 1791; *Oracle,* May 16, 1791.

June 24, 1791. Ranelagh House. A Concert of Vocal and Instrumental Music. La Chevaliere D’Eon’s Night. Act 2, Concerto Clarinetto, Mr. William Mahon.

*Diary or Woodfall’s Register*, June 23, 1791; *Public Advertiser,* June 23, 24, 1791; *Star*, June 23, 1791; *World*, June 22, 1791. Concert program, British Library, <https://historicaltexts.jisc.ac.uk/>.

August 15-18, 1791. York Musical Festival. Principal Vocal Performers, Madam Mara, Mrs. Crouch. Principal Instrumental Performers, Messrs. Ashley and Sons, Fisher, Mahon.

*Leeds Intelligencer*, July 19, August 9, 1791; *Sheffield Register, Yorkshire, Derbyshire, & Nottinghamshire Universal Advertiser*, July 1, 15, 29, 1791.

October 21, 1791. Hampshire Music Meeting, 1791, Will be held at Winchester on the 19th of October and two following days. Principal Instrumental, Mr. Mahon.

*Hampshire Chronicle*, October 10, 1791.

September 16, 1791. Bath, New Assembly Room. Principal Vocal Performers. Mrs. Second, Mr. Huttley, and Madam Sibley (Being her first appearance in England.) Clarionet, Mr. Mahon, Bassoon, Mr. Holmes.

*World*, September 11, 1791.

November 3, 1791. Bath, New Assembly-Rooms. The First Subscription Concert. Principal Instrumental Performer, Clarionet, Mr. Mahon.

*Bath Chronicle,* November 3, 1791. James, “Concert Life in Eighteenth-Century Bath,” 788, 790.

November 7, 1791. Bath. Subscription Concerts. Principal Instrumental Performers. Clarionet, Mr. Mahon.

*Bath Chronicle and Weekly Gazette*, November 3, 1791; *World*, November 9, 1791; James, “Concert Lifein Eighteenth-Century Bath,” 789-90.

November 23, 1791. Bath, New Assembly-Rooms. The Second Subscription Concert Wednesday. Principal Instrumental Performers, Clarionet, Mr. Mahon.

*Bath Chronicle and Weekly Gazette*, November 22, 1791.

December 21, 1791. Bath, New Assembly-Rooms. The Fifth Subscription Concert Wednesday. Principal Vocal Perfomers. Mrs. Second, Mr. Huttley, and Madame Sisley. Clarionet, Mr. Mahon.

*Bath Chronicle*, December 15, 1791.

December 24, 1791. Bath, New Assembly-Rooms, in the Great Room. For the Benefit of Mr. Rauzzini. On Saturday Dec. 24 (being *Christmas Eve*) will be performed The Sacred Oratorio of the Messiah. Principal Instrumental Performers, Clarionet, Mr. Mahon. Between the second and third Acts, a Concerto on the Flute, by Mr. Ashe.

*Bath Chronicle and Weekly Gazette*, December 22, 1791.

January 11, 1792. Bath, New Assembly-Rooms. The Second Subscription Concert will be on Wednesday. When Mr. Giornovicchi will play a Concerto on the Violin. Principal Instrumental Performers. Clarionet, Mr. Mahon.

*Bath Journal*, January 9, 1792.

Review of February 20, 1792 Concert. A Concertante on the Clarinet and Bassoon, by [Wm.] Mahon and Parkinson, had a very pleasing effect, and was one of the best performance of the evening.

*Morning Herald*, February 22, 1792.

July 19, 1792. Chippenham Festival of Musick. The Messiah. With a Full Band and Chorus, including Trumpets, Kettle Drums, &c. On the Evening of the same day, will be A Miscellaneous Concert at the White-Hart Inn. Principal Instrumental Performers, Mr. W. Mahon, from London, (Leader of the Band).

*Bath Chronicle and Weekly Gazette*, July 12, 1792.

August 22-24, 1792. Festival of Musick, Salisbury. The New Organ, his Majesty’s Donation to the Cathedral are now completed, will be opened with three Grand Performances of Select Musick of Handel. Principal Instrumental Performers. W. Mahon.

*The Bath Chronicle*, July 26, 1792.

September 27-28, 1792. Hampshire Music Meeting, 1792. Will be celebrated at Winchester. The Sacred Oratorio of The Messiah; Grand Miscellaneous Concert. Principal Instrumental. Mr. G. Ashley (leader of the band), Mr. Dussek, (the celebrated performer on the Grand Piano Forte,) Mr. C. Ashley (principal violoncello), Mr. Hyde (principal trumpet), Messrs. W. Mahon.

*World,* September 15, 1792; *Hampshire Chronicle*, September 17, 24, 1792; *Public Advertiser*, September 20, 1792; *Reading Mercury*, September 24, 1792.

November 21, 1792. Bath, New Assembly-Rooms. The First Subscription Concert with be This (Wednesday) Evening. Act I. Concertante, Clarionet and Bassoon, Messrs. Mahon and Holmes.

*Bath Chronicle and Weekly Gazette*, November 1, 15, 1792.

Review of November 21, 1792 Concert. Holmes and Mahon displayed as usual their masterly execution on the bassoon and clarionet.

*Bath Chronicle and Weekly Gazette*, November 22, 1792.

November 28, 1792. New Assembly-Rooms. The Second Subscription Concert with be This (Wednesday) Evening. Act I. Concertante, Clarionet and Bassoon, Messrs. Mahon and Holmes.

*Bath Chronicle and Weekly Gazette*, November 22, 1792.

December 5, 1792. Bath, New Assembly-Rooms. The Third Subscription Concert with be This (Wednesday) Evening. Act I Concerto Clarionetto, Mr. Mahon.

*Bath Chronicle and Weekly Gazette,* November 29, 1792.

Review of December 5, 1792 concert. The Clarinet Concerto . . . as a composition, was unworthy of Mr. Mahon’s execution. If Mr Rauzzini would condescend to write a Concerto for this admirable performer, it would be a grateful acquisition to the public.

*Bath Herald*, December 10, 1792; James, “Concert Life in Eighteenth-Century Bath,” 121.

December 12, 1792. Bath, New Assembly-Rooms. The Fourth Subscription Concert will be this (Wednesday) Evening. Clarionet, Mr. Mahon. Act. I. Concertante, Clarionet and Bassoon, Messrs. Mahon and Holmes.

*Bath Chronicle and Weekly Gazette,* December 6, 1792.

December 26, 1792. Bath. New Assembly-Rooms. The Sixth Subscription Concert with be Wednesday Evening. Clarionet, Mr. Mahon. Act I. Concertante Clarionet and Bassoon, Messrs. Mahon and Holmes.

*Bath Chronicle and Weekly Gazette*, December 27, 1792.

January 2, 1793. Bath, New-Assembly-Rooms, The Seventh Subscription Concert will be on Wednesday. Principal Instrumental Performers, Clarionet Mr. Mahon. Act I Concerto Clarionet, Mr. Mahon.

*Bath Journal*, December 31, 1792.

January 23, 1793. Bath, New Assembly-Rooms. The Eighth and Last Subscription Concert will be on Wednesday. Principal Vocal Perfomers, Mr. Nield, and Madame Dussek. Principal Instrumental Performers, Clarionet, Mr. Mahon.

*Bath Chronicle*, January 10, 1793.

February 11, 1793. Professional Concert, Hanover Square. Clarinets, Messrs. [Wm.] Mahon and Howles.

*Times*, January 29, 1793; *Morning Post*, January 24, 1793; *Morning Chronicle*, January 23, 24, 29, 1793; *Diary or Woodfall’s Register*, January 21, 26, 1793; *World*, January 18, 22, 1793; *Morning Herald*, January 23, 1793; *Observer*, February 3, 1793.

February 14, 1793. Willis’s Rooms. Harrison and Knyvett’s Vocal Concert. No. II. Instrumental Performers – Violins, Mr. [Wm.] Mahon.

Concert Program, British Library, 2, https://historicaltexts.jisc.ac.uk/.

February 15, 1793. New Theatre-Royal, Covent Garden. Oratorios and Selections of Sacred Music. Among the instrumental performers are Mahon.

*Morning Post*, February 12, 1793; *Diary or Woodfall’s Register*, February 15, 1793; *Morning Post*, February 14, 1793.

February 21, 1793. Willis’s Rooms. Harrison and Knyvett’s Vocal Concert. No. III. Instrumental Performers – Violins, Mr. Mahon.

Concert Program, British Library, 2, https://historicaltexts.jisc.ac.uk/.

February 22, 1793. Theatre Royal, Covent-Garden, L’Allegro ed il Pensiroso. Among the Instrumental Performers are, Messrs. C. Ashley, [W.] Mahon (violin), Boyce.

Concert Program, British Library, https://historicaltexts.jisc.ac.uk/.

March 7, 1793. Willis’s Rooms. Harrison and Knyvett’s Vocal Concert. No. V. Instrumental Performers – Violins, Mr. Mahon.

Concert Program, British Library, 2, https://historicaltexts.jisc.ac.uk/.

March 15, 1793. New Theatre Royal, Covent Garden. Will be performed the Sacred Oratorio of The Messiah. Among the Instrumental Performers are, Messrs. C. Ashley, Parkinson, [W.] Mahon.

Concert Program, British Library, https://historicaltexts.jisc.ac.uk/.

March 21, 1793. Willis’s Rooms. Harrison and Knyvett’s Vocal Concert. No. VII. Instrumental Performers – Violins, Mr. Mahon.

Concert Program, British Library, 2, https://historicaltexts.jisc.ac.uk/.

April 11, 1793. Willis’s Rooms. Harrison and Knyvett’s Vocal Concert. No. VIII. Instrumental Performers – Violins, Mr. Mahon.

Concert Program, British Library, 1, https://historicaltexts.jisc.ac.uk/.

April 25, 1793. Willis’s Rooms. Harrison and Knyvett’s Vocal Concert. No. X. Instrumental Performers – Violins, Mr. Mahon.

Concert Program, British Library, 1, https://historicaltexts.jisc.ac.uk/.

November 13, 1793. Bath. New Assembly-Rooms. There will be Eight Subscription Concerts to begin Wednesday Nov. 13th. Principal Instrumental Performers, Clarionet, Mr. Mahon.

*Bath Chronicle and Weekly Gazette*, November 14, 1793.

November 20, 1793. Bath. New Assembly-Rooms. The Second Subscription Concert, Wednesday. Principal Vocal Performers, Mr. Nield and Signor Negri. Clarionet, Mr. Mahon. Concertante, Mr. Messrs. Mahon and Holmes.

*Bath Chronicle and Weekly Gazette,* November 21, 1793.

January 1, 1794. Bath, New Assembly-Rooms, The Sixth Subscription Concert. Wednesday. Principal Vocal Performers, Mr. Nield, and Signora Negri. First Violin, Mr. Brooks, Clarionet Mr. Mahon.

*Bath Chronicle*, January 2, 1794.

January 23, 1794. Bath, New Assembly Rooms. The Eighth and Last Subscription Concert This Evening (Wednesday). Principal Instrumental Performers, Mr. [Wm.] Mahon.

*Bath Chronicle and Weekly Gazette*, January 24, 1794.

February 18, 1794. Derby Subscription Concert. The second concert will be at the King’s Head. Act 2d. Concerto Clarinet, Mahon.

*Derby Mercury*, February 13, 1794.

March 12, 1794. Opening of the Theatre Royal, Drury Lane., Wednesday. A Grand selection of sacred music, from the Works of Handel. Principal Vocal Performers, Mr. Harrison, Amongst the principal Instrumental Performers, Mess. Ashly, Sargant, [W.] Mahon (violin).

*The Times*, March 8, 1794; Concert Program, British Library, https://historicaltexts.jisc.ac.uk/.

March 19, 1794. Theatre Royal, Covent Garden, on Wednesday nest will be performed A Grand Selection of Sacred Music, From the Works of Handel. Among other principal instrumental performers are, Messrs. Forster, [Wm.] Mahon (Violin).

*Times*, March 17, 19, 1794.

March 24, 1794. Free-Mason’s Hall, A Grand Concert of Vocal & Instrumental Music, For promoting the Fund for compleating the School-House, now erecting in St. George’s Fields, for the reception and maintenance of 100 poor Female Orphans and Children of distressed Free-Masons. Principal Vocal Performer’s Madame Mara, Miss Parke, Mr. Neild. Leader of the Band, Mr. Cramer. Among the instrumental performers are Mr. [William] Mahon, Mr. Oliver.

*The Times*, March 24, 1794.

March 26, 1794. Theatre-Royal, in Covent Garden. Third Grand Selection of Sacred Music. Leader of the Band, Mr. G. Ashley, Among other Principal Instrumental Performers are—Messrs. Foster, Mahon (violin).

Concert Program, British Library, https://historicaltexts.jisc.ac.uk/.

March 28, 1794. Theatre-Royal, in Covent Garden. Among other Principal Instrumental Performers are—Messrs. Foster, [W.] Mahon (violin).

Concert Program, British Library, https://historicaltexts.jisc.ac.uk/.

April 2, 1794. Theatre-Royal, in Covent Garden, This present Wednesday. *L’Allegro ed il Pensieroso,* The Words by Milton, and set to Music by Handel. With a Grand Miscellaneous Act. Principal Vocal Performers, Madame Mara. Among other Principal Instrumental Performers, are—Mess. Foster (violin), Mahon (violin).

Concert Program, British Library, https://historicaltexts.jisc.ac.uk/.

April 6, 1794. Theatre-Royal, in Covent Garden, L’Allegro ed il Pensieroso, With a Grand Miscellaneous Act. Principal Vocal Performers, Madame Mara. Leader of the Band, Mr. G. Ashley. Among the Principal Instrumental Performers are—Mess. Ashley and Sons, Billington, [W.] Mahon (violin), J. Mahon (clarinet) [probably and error], the Leanders (horns).

Concert Program, British Library, https://historicaltexts.jisc.ac.uk/.

January 14, 1796. Hull. Mr. Tully Master of the Royal Surry Band Begs leave to inform the Ladies and Gentlemen of Hull, &c. that his Concert will be at the Assembly Room, Dagger-Lane. Act. II. Quartetto (Clarinet, Violins, Tenor & Bass), Mahon.

*Hull Advertiser and Exchange Gazette*, January 2, 1796.

February 5, 1795. London, Vocal Concert, Willis’s Rooms. Among the Instrumental performers, Mahon.

*Oracle and Public Advertiser*, February 5, 1795.

February 20, 1795. London, New Pantheon, Oxford-Street, A Grand Selection of Sacred Music, From the Works of Handel. Principal Instrumental Performers, Mahon.

*Morning Post* *and Fashionable World,* February 18, 1795; *Oracle and Public Advertiser*, February 18, 19, 1795.

March 4, 1795. London, Theatre-Royal, Covent Garden. Principal Vocal Performers, Miss Parke. Leader of the Band, Mr. G. Ashley. Principal Instrumental Performers, Messrs. C. Ashley, Mahon.

*The Times*, March 2, 1795.

February 3, 1796. The New Room, King’s Theatre, Haymarket. Concert of Antient Music No. 1. Instrumental Performers – Violins, Mr. Mahon.

Concert Program, British Library xv, https://historicaltexts.jisc.ac.uk/.

February 17, 1796. The New Room, King’s Theatre, Haymarket. Concert of Antient Music No. 2. Instrumental Performers – Violins, Mr. Mahon.

Concert Program, British Library, xv, https://historicaltexts.jisc.ac.uk/.

February 24, 1796. The New Room, King’s Theatre, Haymarket. Concert of Antient Music No. 3. Instrumental Performers – Violins, Mr. Mahon.

Concert Program, British Library, xv, https://historicaltexts.jisc.ac.uk/.

March 2, 1796. The New Room, King’s Theatre, Haymarket. Concert of Antient Music No. 4. Instrumental Performers – Violins, Mr. Mahon.

Concert Program, British Library, xv, https://historicaltexts.jisc.ac.uk/.

March 11, 1796. The New Room, King’s Theatre, Haymarket. Concert of Antient Music No. 5. Instrumental Performers – Violins, Mr. Mahon.

Concert Program, British Library, xv, https://historicaltexts.jisc.ac.uk/.

March 16, 1796. The New Room, King’s Theatre, Haymarket. Concert of Antient Music No. 6. Instrumental Performers – Violins, Mr. Mahon.

Concert Program, British Library, xv, https://historicaltexts.jisc.ac.uk/.

April 4, 1796. London, Queen-Street Chapel, Lincoln’s-Inn-Fields. On Thursday Morning will be performed the Sacred Oratorio of The Messiah. Leader of the Band, Mr. Cramer. Mahon.

*The Times*, April 4, 1796.

April 6, 1796. The New Room, King’s Theatre, Haymarket. Concert of Antient Music No. 7. Instrumental Performers – Violins, Mr. Mahon.

Concert Program, British Library, xv, https://historicaltexts.jisc.ac.uk/.

April 13, 1796. The New Room, King’s Theatre, Haymarket. Concert of Antient Music No. 8. Instrumental Performers – Violins, Mr. Mahon.

Concert Program, British Library, xv, https://historicaltexts.jisc.ac.uk/.

April 20, 1796. The New Room, King’s Theatre, Haymarket. Concert of Antient Music No. 9. Instrumental Performers – Violins, Mr. Mahon.

Concert Program, British Library, xv, https://historicaltexts.jisc.ac.uk/.

April 27, 1796. The New Room, King’s Theatre, Haymarket. Concert of Antient Music No. 10. Instrumental Performers – Violins, Mr. Mahon.

Concert Program, British Library, xv, https://historicaltexts.jisc.ac.uk/.

May 4, 1796. The New Room, King’s Theatre, Haymarket. Concert of Antient Music No. 11. Instrumental Performers – Violins, Mr. Mahon.

Concert Program, British Library, xv, https://historicaltexts.jisc.ac.uk/.

May 11, 1796. The New Room, King’s Theatre, Haymarket. Concert of Antient Music No. 12. Instrumental Performers – Violins, Mr. Mahon.

Concert Program, British Library, xv, https://historicaltexts.jisc.ac.uk/.

October 15, 1796. In anticipation of the Hampshire Music Meeting at Winchester. We have to congratulate the Lovers of Music on the feast they will partake of at Winchester next week. In addition to a good list of Singers, amongst whom we recognize Mrs. Second, . . . Cramer leads, and the elder Mahon, who has long been out of the kingdom, and who is acknowledged the finest Clarionet Performer this country ever heard, is, together with his Brother, with Young Cramer, C. Ashley, Smart, and Son, and many others of the same eminence, to be found amongst the list of Instrumental Performers.

*Star*, October 15, 1796.

October 19-21, 1796. Hampshire Music Meeting, 1796, will be held at Winchester and two following days. Principal Vocal Performers: Mrs. Second, Mr. James Mahon. Principal Instrumental Performers, Mr. Cramer (Leader of the Band), Mr. C. Ashley, Principal Violoncello, Mr. John Mahon (violin section), Mr. Cramer, jun., Mr. Stuart (principal Double Bass), Mr. William Mahon (clarinet). On Wednesday evening, will be performed, The First Part of Alexander’s Feast; with select pieces. In which will be introduced a favourite Clarionet Concerto by Mr. John Mahon.

*Hampshire Chronicle*, October 8, 15, 1796; *Star,* October, 15, 1796.

November 29, 1796. Theatre Royal, Covent Garden, will be presented a new Comic Opera, (in three acts) called Abroad and at Home, The New Music composed by Mr. Shield. Seventh Time. The Selections from Gretry, Giornovichi, Jackson, and Mahon.

*Oracle and Public Advertiser*, November 29, 1796.

February 8, 1797. The New Room, King’s Theatre, Haymarket. Concert of Antient Music No. 1. Instrumental Performers – Violins, Mr. Mahon.

Concert Program, British Library, xii, https://historicaltexts.jisc.ac.uk/.

February 15, 1797. The New Room, King’s Theatre, Haymarket. Concert of Antient Music No. 2. Instrumental Performers – Violins, Mr. Mahon.

Concert Program, British Library, xii, https://historicaltexts.jisc.ac.uk/.

February 22, 1797. The New Room, King’s Theatre, Haymarket. Concert of Antient Music No. 3. Instrumental Performers – Violins, Mr. Mahon.

Concert Program, British Library, xii, https://historicaltexts.jisc.ac.uk/.

March 10, 1797. The New Room, King’s Theatre, Haymarket. Concert of Antient Music No. 4. Instrumental Performers – Violins, Mr. Mahon.

Concert Program, British Library, xii, https://historicaltexts.jisc.ac.uk/.

March 15, 1797. The New Room, King’s Theatre, Haymarket. Concert of Antient Music No. 5. Instrumental Performers – Violins, Mr. Mahon.

Concert Program, British Library, xii, https://historicaltexts.jisc.ac.uk/.

March 22, 1797. The New Room, King’s Theatre, Haymarket. Concert of Antient Music No. 6. Instrumental Performers – Violins, Mr. Mahon.

Concert Program, British Library, xii, https://historicaltexts.jisc.ac.uk/.

March 29, 1797. The New Room, King’s Theatre, Haymarket. Concert of Antient Music No. 7. Instrumental Performers – Violins, Mr. Mahon.

Concert Program, British Library, xii, https://historicaltexts.jisc.ac.uk/.

April 5, 1797. The New Room, King’s Theatre, Haymarket. Concert of Antient Music No. 8. Instrumental Performers – Violins, Mr. Mahon.

Concert Program, British Library, xii, https://historicaltexts.jisc.ac.uk/.

April 26, 1797. The New Room, King’s Theatre, Haymarket. Concert of Antient Music No. 9. Instrumental Performers – Violins, Mr. Mahon.

Concert Program, British Library, xii, https://historicaltexts.jisc.ac.uk/.

May 3, 1797. The New Room, King’s Theatre, Haymarket. Concert of Antient Music No. 10. Instrumental Performers – Violins, Mr. Mahon.

Concert Program, British Library, xii, https://historicaltexts.jisc.ac.uk/.

May 10, 1797. The New Room, King’s Theatre, Haymarket. Concert of Antient Music No. 11. Instrumental Performers – Violins, Mr. Mahon.

Concert Program, British Library, xii, https://historicaltexts.jisc.ac.uk/.

May 17, 1797. The New Room, King’s Theatre, Haymarket. Concert of Antient Music No. 12. Instrumental Performers – Violins, Mr. Mahon.

Concert Program, British Library, xii, https://historicaltexts.jisc.ac.uk/.

September 6-8, 1797. Hampshire Music Meeting, 1797. Will be held at Winchester. Vocal Performers, Madame Mara, James Mahon; Principal Instrumental Performers, Mr. John Mahon, (leader of the band), Mr. [Wm.] Mahon. On Thursday Morning, The Sacred Oratorio of The Messiah. . . On Thursday Evening, at the New Theatre, will be performed a Selection from Acis and Galatea. September 7, with a Concerto on the Clarionet, by Mr. John Mahon.

*Reading Mercury*, August 28, 1797; *Star and Evening Advertiser*, August 30, 31, 1797.

February 7, 1798. The New Room, King’s Theatre, Haymarket. Concert of Antient Music No. 1. Leader – Mr. Cramer, Instrumental Performers – Violins, Mr. Mahon.

Concert Program, British Library, 7, https://historicaltexts.jisc.ac.uk/.

February 14, 1798. The New Room, King’s Theatre, Haymarket. Concert of Antient Music No. 2. Leader – Mr. Cramer, Instrumental Performers – Violins, Mr. Mahon.

Concert Program, British Library, 7, https://historicaltexts.jisc.ac.uk/.

February 23, 1798. The New Room, King’s Theatre, Haymarket. Concert of Antient Music No. 3. Leader – Mr. Cramer, Instrumental Performers – Violins, Mr. Mahon.

Concert Program, British Library, 7, https://historicaltexts.jisc.ac.uk/.

February 28, 1798. The New Room, King’s Theatre, Haymarket. Concert of Antient Music No. 4. Leader – Mr. Cramer, Instrumental Performers – Violins, Mr. Mahon.

Concert Program, British Library, 7, https://historicaltexts.jisc.ac.uk/.

March 9, 1798. The New Room, King’s Theatre, Haymarket. Concert of Antient Music No. 5. Leader – Mr. Cramer, Instrumental Performers – Violins, Mr. Mahon.

Concert Program, British Library, 7, https://historicaltexts.jisc.ac.uk/.

March 14, 1798. The New Room, King’s Theatre, Haymarket. Concert of Antient Music No. 6. Leader – Mr. Cramer, Instrumental Performers – Violins, Mr. Mahon.

Concert Program, British Library, 7, https://historicaltexts.jisc.ac.uk/.

March 21, 1798. The New Room, King’s Theatre, Haymarket. Concert of Antient Music No. 7. Leader – Mr. Cramer, Instrumental Performers – Violins, Mr. Mahon.

Concert Program, British Library, 7, https://historicaltexts.jisc.ac.uk/.

March 28, 1798. The New Room, King’s Theatre, Haymarket. Concert of Antient Music No. 8. Leader – Mr. Cramer, Instrumental Performers – Violins, Mr. Mahon.

Concert Program, British Library, 7, https://historicaltexts.jisc.ac.uk/.

March 30, 1798. Great Room, King’s Theatre. A Grand Concert, by the Band of the Concert of Antient Music, in aid of the Voluntary Contributions for the Defence of the Country. Violins, Mr. Mahon.

Concert Program, British Library, https://historicaltexts.jisc.ac.uk/.

April 18, 1798. The New Room, King’s Theatre, Haymarket. Concert of Antient Music No. 9. Leader – Mr. Cramer, Instrumental Performers – Violins, Mr. Mahon.

Concert Program, British Library, 7, https://historicaltexts.jisc.ac.uk/.

April 25, 1798. The New Room, King’s Theatre, Haymarket. Concert of Antient Music No. 10. Leader – Mr. Cramer, Instrumental Performers – Violins, Mr. Mahon.

Concert Program, British Library, 7, https://historicaltexts.jisc.ac.uk/.

May 2, 1798. The New Room, King’s Theatre, Haymarket. Concert of Antient Music No. 11. Leader – Mr. Cramer, Instrumental Performers – Violins, Mr. Mahon.

Concert Program, British Library, 7, https://historicaltexts.jisc.ac.uk/.

May 9, 1798. The New Room, King’s Theatre, Haymarket. Concert of Antient Music No. 12. Leader – Mr. Cramer, Instrumental Performers – Violins, Mr. Mahon.

Concert Program, British Library, 7, https://historicaltexts.jisc.ac.uk/.

November, 1798. At Corfe’s Annual Concert in Salisbury some days ago, William Mahon and Miss Andrews were uncommonly successful.

*Oracle and Daily Advertiser*, November 9, 1798.

December 12, 1798. Bath, New Assembly-Rooms—In the Great Room. The Fourth Subscription Concert will be on Wednesday, December 12th, being the First Choral Night. When Mr. Nield will perform for the first time this season; and Master Pinto will, for the first time play a Concerto on the Violin. The Concert will consist of a Grand Selection from the Works of Handel, with choruses. Mr. Mahon is also engaged for a few nights to play Concertos on the Clarionet.

*Bath Chronicle and Weekly Gazette,* December 1798.

December 24, 1798. Bath, New Assembly-Rooms. For the Benefit of Mr. Rauzzini. On Monday (being Christmas Eve) will be performed the Sacred Oratorio of the Messiah, Compressed in Two Acts, by Handel, with full band and chorus. Principal Vocal Performers, Mr. Nield, Mrs. Mountain, Madame Mara. Mr. Mahon will play a Concerto on the Clarionet, in the first Act.

*Bath Chronicle and Weekly Gazette*, December 6, 20, 1798.

February 13, 1799. The New Room, King’s Theatre, Haymarket. Concert of Antient Music No. 1. Leader – Mr. Cramer, Instrumental Performers – Violins, Mr. Mahon.

Concert Program, British Library, 15, https://historicaltexts.jisc.ac.uk/.

February 20, 1799. The New Room, King’s Theatre, Haymarket. Concert of Antient Music No. 2. Leader – Mr. Cramer, Instrumental Performers – Violins, Mr. Mahon.

Concert Program, British Library, 15, https://historicaltexts.jisc.ac.uk/.

March 1, 1799. The New Room, King’s Theatre, Haymarket. Concert of Antient Music No. 3. Leader – Mr. Cramer, Instrumental Performers – Violins, Mr. Mahon.

Concert Program, British Library, 15, https://historicaltexts.jisc.ac.uk/.

March 6, 1799. The New Room, King’s Theatre, Haymarket. Concert of Antient Music No. 4. Leader – Mr. Cramer, Instrumental Performers – Violins, Mr. Mahon.

Concert Program, British Library, 15, https://historicaltexts.jisc.ac.uk/.

March 13, 1799. The New Room, King’s Theatre, Haymarket. Concert of Antient Music No. 5. Leader – Mr. Cramer, Instrumental Performers – Violins, Mr. Mahon.

Concert Program, British Library, 15, https://historicaltexts.jisc.ac.uk/.

April 3, 1799. The New Room, King’s Theatre, Haymarket. Concert of Antient Music No. 6. Leader – Mr. Cramer, Instrumental Performers – Violins, Mr. Mahon.

Concert Program, British Library, 15, https://historicaltexts.jisc.ac.uk/.

April 10, 1799. The New Room, King’s Theatre, Haymarket. Concert of Antient Music No. 7. Leader – Mr. Cramer, Instrumental Performers – Violins, Mr. Mahon.

Concert Program, British Library, 15, https://historicaltexts.jisc.ac.uk/.

April 17, 1799. The New Room, King’s Theatre, Haymarket. Concert of Antient Music No. 8. Leader – Mr. Cramer, Instrumental Performers – Violins, Mr. Mahon.

Concert Program, British Library, 15, https://historicaltexts.jisc.ac.uk/.

April 24, 1799. The New Room, King’s Theatre, Haymarket. Concert of Antient Music No. 9. Leader – Mr. Cramer, Instrumental Performers – Violins, Mr. Mahon.

Concert Program, British Library, 15, https://historicaltexts.jisc.ac.uk/.

May 1, 1799. The New Room, King’s Theatre, Haymarket. Concert of Antient Music No. 10. Leader – Mr. Cramer, Instrumental Performers – Violins, Mr. Mahon.

Concert Program, British Library, 15, https://historicaltexts.jisc.ac.uk/.

May 3, 1799. Mr. Cramer’s Benefit Concert at the Great Room, King’s Theatre, on Friday when will be performed a Concert of Vocal and Instrumental Music. Second Act. New Concertante, MS. For Violin, Hautboy, Bassoon, Clarinet, and French Horn by Messrs. Cramer, Harrington, Holmes, Mahon, and Leander-Wiele.

*Morning Chronicle*, April 26, 30, May 2, 3, 1799.

May 8, 1799. The New Room, King’s Theatre, Haymarket. Concert of Antient Music No. 11. Leader – Mr. Cramer, Instrumental Performers – Violins, Mr. Mahon.

Concert Program, British Library, 15, https://historicaltexts.jisc.ac.uk/.

May 15, 1799. The New Room, King’s Theatre, Haymarket. Concert of Antient Music No. 12. Leader – Mr. Cramer, Instrumental Performers – Violins, Mr. Mahon.

Concert Program, British Library, 15, https://historicaltexts.jisc.ac.uk/.

November 14, 1799. Salisbury Concert. Mr. Corfe’s Annual Concert is fixed for Thursday. Principal Vocal Performer, Miss Andrews.—Leader of the Band, Mr. W. Mahon (violin).

*Salisbury and Winchester Journal*, October 28, November 11, 1799.

Review of November 14, 1799 Concert. Mr. Corfe’s Annual Concert attracted a croud of beauty, Grace and Fashion, seldom outshone, even in the gay regions of the metropolis. Mahon’s Clarionet Concerto displayed all that admirable talent and taste for which he has long been justly famed.

*Salisbury and Winchester Journal*, November 18, 1799.

August 27-29, 1800. Salisbury, Festival of Music. Will be celebrated on Wednesday and two following days. On Wednesday evening, at the Assembly-Room, will be a Miscellaneous Concert, after which will be a Ball. On Thursday evening, at the Cathedral, will be a Grand Selection; on Thursday Evening, A Select Concert; on Friday morning at the Cathedral, the Sacred Oratorio of Messiah. Leader of the Band, Mr. Cramer; Oboes, Messrs. Ling and Oliver; Clarionet, Mr. W. Mahon.

*Star*, June 21, 1800; *Sun*, August 7, 1800; *Sherborne Mercury*, August 4, 1800; *Bath Chronicle and Weekly Gazette,* May 22, August 7, 1800.

September 1, 1800. Salisbury. Grand Concert. Under the Patronage of the Most Noble The Marquis of Salisbury. Mr. [William] Mahon, Respectfully informs the Ladies and Gentlemen of Colchester, and its vicinity, that on Monday next, will be performed at the Assembly Room, White Hart, A Grand Concert of Vocal and Instrumental Music. By Permission, The Marquis of Salisbury’s Band will assist, and perform several grand military pieces. Leader of the Band Mr. Mahon, Who will perform several favourite Concertos on the Clarionet and Violin.

*Ipswich Journal*, August 30, 1800.

October 7-9, 1800. Hampshire Musical Festival. Will commence at Winchester On Tuesday and the two following days: at St. John’s House. Wednesday in the Cathedral will be performed the whole of the Sacred Oratorio of The Creation, Principal Instrumental, Wm. Mahon, Clarionet.

*Reading Mercury*, September 22, October, 6, 1800; *Star*, October 2, 1800.

Review of Hampshire Musical Festival, October 7-9. Winchester. Linley’s concerto on the violoncello on Thursday evening was universally allowed to excel any thing of the kind every heard; as was the double concerto on the clarionet and bassoon by Mahon and Holmes, whose merits on their respective instruments claimed the particular attention of the audience.

*Hampshire Chronicle*, October 13, 1800.

February 27, 1801. Oratorios at Play-House Prices during Lent. Theatre Royal, Covent Garden, To-Morrow Evening with be performed, for the only time this season, the Sacred Oratorio of The Creation, Composed by G. Haydn, Mus. D. Maestro di Capella to His Serene Highness the Prince of Esterhazy. End of Part I: a Concerto on the Clarionet, by W. Mahon.

*London Courier and Evening Gazette*, February 26, 1801; *The Sun*, February 26, 1801; *Morning Chronicle*, February 26, 27, 1801; *Morning Post*, February 26, 27, 1801; *Sun*, February 26, 1801.

March 13, 1801. Oratorios at Play-House Prices during Lent. Theatre Royal, Covent Garden. The Sacred Oratorio of the Messiah Composed by G. F. Handel. End of Part I. a Concerto on the Clarionet, by Mr. W. Mahon.

*Morning Chronicle*, March 12, 1801; *London Courier and Evening Gazette*, March 12, 1801; *Morning Post*, March 12, 13, 1801; *Star*, March 12, 1801.

March 20, 1801. The Last Night but two. Oratorios at Play-House Prices During Lent. Theatre-Royal, Covent-Garden. To-Morrow Evening will be performed a Grand Selection in which will be introduced (by Particular Desire), End of Part 1, a Concertante for Clarionet and Bassoon, by Mr. W. Mahon, and Mr. Parkinson.

*Morning Chronicle*, March 19, 1801; *Sun*, March 19, 1801; *Star*, March 19, 1801; *Morning Post*, March 19, 20, 1801.

March 24, 1801. Great Concert-Rooms, King’s Theatre. Mr. Salomon . . . intends having IX Concerts, divided into Two Subscriptions for Three Nights each. The Instrumental Performances will consist of the most admired Symphonies composed for Mr. Salomon by Dr. Dr. Haydn, and several new Compositions which he lately received, as also Concertos and Concertantes for different instruments, executed by the following eminent Performers. Clarinet, Mr. W. Mahon.

*Morning Chronicle*, March 21, 24, 1801.

April 9, 1801. Great Room, King’s Theatre. Mr. Salomon. Six Concerts. Clarinet, Mr. W. Mahon.

*The Times*, March 23, 1801; *Morning Post*, March 30, 1801.

April 23, 1801. Great Room, King’s Theatre. Mr. Salomon most respectfully acquaints the Nobility and Gentry, that the Last of his Subscription Concerts will be on Thursday, the 23d Instant. Part I. New Grand Sestetto (MS.) for Principal Violin, Viola, Violoncello, Clarionet, Bassoon, Corno, and Double Bass, Messrs. Salomon, Pieltain, Dahmen, W. Mahon, Holmes, Leander, and Dragonetti. Luigi van Beethoven. First performance in London of Beethoven’s Septet, op. 20 (1799-1800).

*Morning Post*, April 20, 21, 23, 1801; *Morning Chronicle*, April 21, 23, 1801; Taylor, *Music in London*, 47, 162.

Review of April 23 Concert. The success which attends Salomon’s Concerts is the necessary effect of their merit. The third performance last night had a more numerous and elegant audience than any other this season. The room was completely full, and the entertainment gratifying in the highest degree. The instrumental novelty of the evening was *Sestetto* for the Violin, Viola, Violin cello; Clarionet, Bassoon, Corno, and Double Bass; the merits of which received the best support from Salomon, Pieltain, Dahmen, Mahon, Leander, and Dragonetti. It was composed by Luigi Van Beethoven, a pupil, we believe, of Mozart. It is airy, playful, and learned, and in all respects shews the hand of a master.

*London Courier and Evening Gazette*, April 24, 1801.

May 21, 1801. King’s Theatre, Ancient Concert Room. Messrs. John and Francis Cramer’s Benefit Concert. A Grand Concert of Vocal and Instrumental Music. Principal Instrumental Performers including W. Mahon. Principal Instrumental Performers, Messrs. F. Cramer, Monzani, Leander, Holmes, Mahon, Dragonetti.

*Morning Post*, May 11, 14, 1801.

May 27, 1801. For the Benefit of Mr. Salomon. Great Room, King’s Theatre. Grand Concert of Vocal and Instrumental Music. Part II. By particular Desire, the New much admired Septetto (MS.) [Beethoven] for a principal Violin, Viola, Clarionet, Fagotto, Corno, Violoncello, and Contrabasso, W. Mahon.

*Morning Post*, May 23; May 27, 1801; *Morning Chronicle*, May 23, 1801; Taylor, *Music in London*, 47, 162.

May 29, 1801. Antient Music Room, King’s Theatre. For the Benefit of Mr. Lee. Concert. Concertante, for Bassoon and Hautboy, by Messrs. Holmes and Wm. Mahon.

*The Morning Post and Gazetteer*, May 25, 1801; *Morning Chronicle*, May 26, 1801; *Morning Post*, May 28, 1801.

Review of Blandford Concert, July 29-30, 1801. Mrs. Second, Messrs. Bartleman, Nield, Knyett, John and Wm. Mahon, Holmes, Reinagle, and Lindley, were among the performers at the Concert, under the direction of Mr. John Mahon, performed on Wednesday evening, and honoured with the attendance of his Royal Highness the Duke of Cumberland. In the first Act, the mellifluous notes of Mrs. Second gave the happiest effect to an Italian song by Mortellari; In the second Act, she showed the extend of her powers in a bravura song, in which her brother, Mr. [John] Mahon, accompanied her on the clarionet, and the plaudits of the auditors expressed how highly the appreciated her merits. The instrumental pieces consisted of a Violin Concerto, by Mahon; Concertante, Clarionet and Bassoon, W. Mahon and Holmes; Trio, Violin, Tenor, and Violoncello, by Mahon, Reinagle, and Lindley. On Thursday morning there was again a Concert, chiefly of Catches and Glees. Mrs. Second sung “Sweet Echo!” accompanied by the Clarionet, most sweetly, the effect of which was much heightened by the admirable imitation of the Echo, contrived by Mr. W. Mahon making the responses from without the room, where he was unseen by the audience.

*Salisbury and Winchester Journal*, July 27, August 3, 1801; *Morning Post*, August 4, 1801; *London Courier and Evening Gazette*, August 5, 1801.

September 10, 1801. Salisbury Concert. On Thursday, September 10, being the middle Evening of the Races, will be A Concert and Ball, at the Assembly-Room. Mr. W. Mahon is engaged. *Salisbury and Winchester Journal*, September 7, 1801.

September 16-18, 1801. Hereford Music Meeting. Friday Morning at the Cathedral, The Messiah. In the Evening, at the Music-Room, A Grand Miscellaneous Concert. Instrumental Performers. Leader of the Band, Mr. Cramer. Mr. W. Mahon.

*Hereford Journal*, August 12, 19, 26, 1801; *Gloucester Journal*, September 7, 14, 1801.

September 23-25, 1801. Winchester. The Hampshire Musical Festival under the direction of Mr. Chard. On Friday Morning, The Messiah, which will be opened by Madame Mara. Thursday and Friday Evenings, Grand Miscellaneous Concerts. Principal Instrumental:--Mr. Salomon, Leander, Mr. W. Mahon, clarinet.

*Salisbury and Winchester Journal*, August 31, 1801, September, 21, 1801; *Sun*, September 16, 21, 1801.

December 17, 1801. Salisbury Concert. On Thursday will be a Grand Choral Concert. Principal Singer, Mrs. Second; Leader of the Band, Mr. W. Mahon.

*Salisbury and Winchester Journal*, December 7, 1801.

February 4, 1802. Hyde’s Concert Rooms, Tottenham-street. Messrs. Charles and Samuel Wesley respectfully inform their Friends and the Public, that they propose to perform by Subscription, Six Miscellaneous Concerts of Vocal and Instrumental Music. Principal Vocal Performers, Madame Dussek, Leader of the Band, Mr. Bossi. Among the principal instrument performers are, Mess. Lindley, Mahon, Oliver.

*Sun*, February 2, 3, 1802.

February 19, 1802. Vocal Concert, 1802. Messrs. Harrison, W. Knyvett, Bartelman, and Greatorex, most respectfully acquaint the Nobility and Gentry, that the Concerts will commence on Friday, at Willis’s Rooms, King-street, St. James’s-square. The Leader of the Band, Mr. Cramer. Clarinets, Messrs. Mahon and Oliver.

*Morning Chronicle*, January 27, 1802; *Sun*, January 27, 1802; *Morning Post*, January 29, 1802; *London Courier and Evening Gazette*, January 30, 1802.

February 24, 1802. Great Room, King’s Theatre. Mr. F. Griesbach most respectfully informs the Nobility, Gentry, and his Friends in General, that his Concert is fixed for Monday. Vocal Performers, Madame Dussek, Miss Tennant, and Mr. Bartleman. Principal Instrumental Performers, Messrs. Saust, [Wm.] Mahon, Holmes.

*Sun*, February 24, 1802.

March 1, 1802. Great Room, King’s Theatre. Mr. F. Griesbach most respectfully informs the Nobility, Gentry, and his Friends in general, that his concert is fixed for Monday. Principal Instrumental Performers—Messrs. Saust, Mahon, Holmes.

*Morning Chronicle*, February 22, 27, March 1, 1802.

April 9, 1802. Under the Patronage of Lady Dalkeith. Mr Mahon’s Concert. Mr Mahon has the honour of informing the Nobility, Genry, his Friends, and the Public, that his Benefit Concert is fixed for To-Morrow. New Assembly Rooms, George Street, When Mrs Mahon will make her first Appearance these Six Years. Act I. Quartetto Violins, &c., Mahon. Concerto, Clarinet, with Favourite Airs, Mr Mahon; Song, “A round of brave British Tars,” Mr. Mahon. Act II. Pleyel’s New Concertante for Two Violins Obligato, &c. Mess. Stabilini and Mahon; Duett Concertante, for Clarinet and Oboe, Mess. Mahon and Fraser. Recitative and Song, Mr. Urbani, on the happy Return of Peace—Mahon.

*Caledonian Mercury*, April 8, 1802.

May 13, 1802. King’s Theatre—Antient Concert-room, Haymarket. Messrs. John and Francois Cramer beg leave to inform the Nobility, Gentry, and their Friends in general, that their benefit is fixed for this evening, when will be performed a Grand Concert of Vocal and Instrumental Music. Act II. Overture to Zauberflotte—Mozart. Principal Instrument Performers: Madame Dussek, Messrs. F. Cramer, Monzani, Holmes, William Mahon and Dragonetti.

*Morning Post*, May 11, 13, 1802; *Morning Chronicle*, April 29, May 4, 7, 1802.

July 29, 1802. Salisbury Concert. On Thursday being the middle Evening of the Races, will be a concert and bass, at the Assembly Room. Mrs. J. Goss, from London, is engaged. Mr. William Mahon, Leader of the Band (violin).

*Salisbury & Winchester Journal*, July 26, 1802.

September 22-24, 1802. Birmingham Musical Festival, for the Benefit of the General Hospital. The Oratorio of Creation, Composed by Haydn A Grand miscellaneous Concert with a selection from Acis and Galatea. The Messiah, a Grand Miscellaneous Concert. Madame Dusseck, Mr. Mahon, Clarionet.

*Derby Mercury*, September 16, 1802.

October 6-8, 1802. The Hampshire Musical Festival, Under the Direction of Mr. Chard. Will be celebrated at Winchester, on Wednesday and the two following days. Principal Vocal Performers, Mrs. Second, Mrs. Mountain, Principal Instrumental Performers, Mr. Francis Cramer, Leader; Mr. W. Mahon, Clarionet, Mr. Ling, Oboe.

*Salisbury and Winchester Journal*, September 27, 1802; *Sun*, October 1, 2, 4, 1802; *Star*, October 4, 1802; *Hampshire Chronicle*, October 4, 1802; *Hampshire Telegraph and Naval Chronicle*, September 27, 1802.

November 17, 1802. Bath, New Assembly-Rooms, Subscription Concerts. Twelve Subscription Concert. Principal Instrumental Performers, Mr. Lindley, on the Violoncello, Mr. Wm. Mahon, on the Clarionet.

*Bath Chronicle and Weekly Gazette*, October 28; November 11, 1802.

November 24, 1802. Bath, New Assembly-Rooms. The Second Subscription Concert will be on Wednesday. Principal Instrumental Performers, Mr. Wm. Mahon on the Clarionet.

*Bath Chronicle and Weekly Gazette*, November 18, 1802.

Review of November 24, 1802 Concert in Bath. It will be readily allowed by the numerous and brilliant assembly which graced the Upper-Rooms on Wednesday evening, that the first blossoms of Mr. Rauzzini’s Concerts afforded the fairest promise of a productive and satisfactory harvest. The same zeal on the part of the manager was evinced in the capital selection of music for the evening, which was seconded by the same successful endeavours to delight on the part of the performers; some of them indeed far exceeded their accustomed excellence, and seemed to have acquired additional powers during the few months which have separated them from the Bath audience. Miss Parke’s “Sweet Bird” also equalled any of the *warblers* who have ever given us this exquisite piece from the same place. Mahon’s clarionet was as usual an astonishing performance, both for sweetness and execution.

*Bath Chronicle and Weekly Gazette*, November 25, 1802.

December 1, 1802. Bath, New Assembly-Rooms. The third subscription concert. Principal Instrumental Performers. Mr. Lindley, on the Violoncello; Mr. Wm. Mahon, on the Clarionet.

*Bath Chronicle and Weekly Gazette*, November 25, 1802.

December 8, 1802. Bath, New Assembly-Rooms. The Fourth Subscription Concert. Mr. Lindly, on the Violoncello; Mr. Wm. Mahon, on the Clarionet.

*Bath Chronicle and Weekly Gazette*, December 2, 1802.

August 2-4, 1803. Stamford Grand Musical Festival. Principal vocal performers: Mrs. Ashe. Instrumental, Leader of the Band, Professor Hague, Clarionet, Mr. Mahon.

*Stamford Mercury*, June 24, 1803.

August 18, 1803. Salisbury Concert. On Thursday being the middle evening of the Races, will be, by permission of the Worshipful the Mayor and Justices, a Concert and Ball, in the Council Chamber. Act I. Song (Bravura) “Leita Quest Alma,” Mrs. Second, accompanied on the Clarionet by Mr. W. Mahon, Sacchini. Leader of the Band—Mr. William Mahon.

*Salisbury and Winchester Journal*, August 8, 15, 1803.

Review of August 18-19, 1803 Concert. Salisbury. The Concert and Balls at the Council Chamber on Thursday and Friday evening, were however both numerously and fashionably attended, most of the principal families of the neighbourhood being present each night. The Concert was conducted by Mr. Corfe; and besides our regular performers, had the powerful support of Mrs. Second and Mr. Wm. Mahon. In the 1st Act, Mrs. Second sung a Bravura of Sacchini, accompanied on the Clarinet by Mr. Mahon, and both deservedly obtained great applause.

*Salisbury and Winchester Journal*, August 22, 1803.

September 12, 1803. “Mrs. Second, since she has declined her engagement at the Opera buffa, in Paris, has to assist at Salisbury, where, in conjunction with her brother, Mr. Mahon, the celebrated clarionet of the Opera-house, she assisted at the Race Concert. The intelligence soon spread round the neighborhood, and 300 person of distinction attended with the amiable Countess of Radnor at their hand.

*Morning Post*, September 12, 1803.

September 27-29, 1803. Worcester Music Meeting, 1803. The Seventy-Ninth Triennial Meeting of the Three Choirs of Worcester, Hereford, and Gloucester. At the Cathedral, on Wednesday Morning, A Sacred Oratorio, The Creation, Dr. Haydn. In the Evening, at the College Hall, A Grand Miscellaneous Concert. Second Act. Concerto, Clarionet, W. Mahon.

*Oxford Journal*, July 23, 25; September 3, 17, 1803; *Bath Chronicle and Weekly Gazette*, September 1, 8, 15, 1803; Lysons, *History*, 246.

October 5-7, 1803. Hampshire Musical Festival. Grand Miscellaneous Concert. Mr. Weischel, Leader of the Band, W. Mahon, Principal Clarionet and Second Violin.

*Morning Post*, September 19, 1803; *Salisbury and Winchester Journal*, October 3, 1803.

March 1, 1804. Ladies’ Concert. The first Ladies Concert of Vocal and Instrumental Music, was held last night at Mrs. Benyon’s, Grosvenor-square. Act II. Concerto Clarionet, Mr. W. Mahon.

*London Courier and Evening Gazette*, March 2, 1804; *Times*, March 2, 1804.

August 22-24, 1804. Festival of Music, Salisbury. A numerous and select Band, particularly adapted to give due force and effect to the Choral Parts, is engaged from the Choirs of St. Paul’s, Chichester, Winchester, Exeter, and the Chapel Royal; with the powerful addition of Double Drums, Trombones, &c. as used in the Performances at Westminster-Abbey. Leader of the Band, Mr. Weichsel, Clarinet Mr. W. Mahon.

*Bath Chronicle and Weekly Gazette*, July 26, 1804; *Sun*, August 10, 1804; *Salisbury and Winchester Journal*, August 20, 1804.

Review August 23, 1804 Cconcert. Salisbury. Messrs. Mahon and Holmes, on the hautboy and bassoon, performed a concertante with the happiest effect.

*London Courier and Evening Gazette*, August 24, 1804.

October 16, 1804. Portsea. Mr. Sibly most respectfully informs his Subscribers and the Public, his First Subscription Concert will be held at the Beneficial Society’s Hall, Portsea, on Tuesday the 16th of October. Part II Concerto Clarionet, Mr. W. Mahon (Mahon).

*Hampshire Telegraph and Sussex Chronicle*, October 15, 1804.

October 17, 1804. Fareham. Grand Miscellaneous Concert. Mr. Sibly most respectfully informs the Nobility, Gentry, and others, that the above Concert will be held at the Assembly-Room, in Fareham, on Wednesday. Part II. Concerto Clarionet, Mr. W. Mahon, Mahon.

*Salisbury and Winchester Journal*, October 15, 1804.

October 27, 1804. The fascinations of winter we perceive open to these Towns on Tuesday evening next, by Mr. Sibly’s First Concert, where the great attraction is the highly-reported musical science of Miss Mortimer, assisted by the celebrated Mr. [William] Mahon on the Clarionet and Mr. Lucas on the violoncello.

*Hampshire Telegraph*, October 15, 1804.

November 8, 1804. New Concert Rooms, Salisbury. The Nobility and Gentry of Salisbury, the Close, and Neighbourhood, are respectfully informed, that on Thursday, there will be a Grand Miscellaneous Concert, for the Benefit of Mr. Harrington. Act II, Concerto Clarinet—Mr. [Wm.] Mahon, Mahon.

*Salisbury and Winchester Journal*, November 5, 1804.

January 15, 1805. Vocal Concert, at the New Rooms, Hanover-square. Messrs. Harrison, Bartelman, and Greatorex, most respectfully acquaint the Nobility and Gentry that the Concerts will commence at the above-mentioned elegant Rooms, on Friday, and be continued on every succeeding Friday to the end of the subscription. Principal Instrumental Performers—Clarinets, Messrs. [Wm.] Mahon and Oliver.

*Morning Post*, January 28, 1805.

January 21, 1805. The Russell Concert, Russell Assembly Rooms in Russell Square. Leader, Mr. Weichsell, Clarionets, Messrs. [Wm.] Mahon and Oliver.

*Morning Post*, January 21, 1805; *Morning Chronicle*, January 24, 1805;Carnelley, *George Smart and nineteenth-century London concert life*, 80.

January 25, 1805. Vocal Concert, at the New Rooms, Hanover-square. Leader of the Band, Mr. F. Cramer, Clarinets, Messrs. [Wm.] Mahon and Oliver.

*Morning Post*, January 28, 1805.

January 31, 1805. Patronised by the Duke and Duchess of Bedford. Russell Assembly Rooms, Great Coram-Street, Russell-Square. The Subscribers and the Public in general are respectfully informed, that the Concerts and Balls at Hannover Rooms, will commence for the season, To-Morrow, Act. 1. Concerto for Clarionet and Bassoon, Messrs. Mahon and Holmes.

*Morning Chronicle*, January 24, 30, 1805.

February 14, 1805. Russell Assembly Rooms. Russell Concerts. Second Subscription Concert. Clarionets, Mahon, Oliver. Act II Grand Symphonie, never performed in this kingdom, Beethoven.

*Morning Post,* February 11, 1805. Carnelley, *George Smart and nineteenth-century London concert life*, 81.

February 15, 1805. Vocal Concert, at the New Rooms in Hanover-Square. Messrs. Harrison, Bartleman, and Greatorex, most respectfully acquaint the Nobility and Gentry, that the Concerts will commence at the above-mentioned elegant Rooms, on Friday and be continued on every succeeding Friday to the end of the Subscription, Passion and Easter weeks excepted. Principal Instrumental Performers, Mahon and Oliver.

*Morning Post*, January 28, 1805; *Times*, January 30, 1805; *Star*, February 1, 1805.

February 21, 1805. Russell Assembly Rooms. Russell Concerts, Third Subscription Concert. Clarionets, Mahon, Oliver.

*Star*, February 20, 1805; *Morning Chronicle*, February 20, 1805.

March 25, 1805. Russell Assembly Rooms. Russell Concerts. The Sixth Concert will be on Monday Next. Act I. Concerto, Clarionet, Mr. Mahon-Mahon. Clarionets, Mahon and Oliver.

*Morning Post*,March 21, 23, 25, 1805.

May 3, 1805. King’s Theatre. Mr. Harrison . . . Annual Concert will be performed in the Great Room, on Friday next. Among the Principal Instrumental Performers is Messr. [Wm.] Mahon. The favourite New Glees performed at the Vocal Concert will be introduced—Act I. Quartet and Grand Chorus, ‘For unto us a Child is born,’ with additional Accompaniments for Wind Instruments by Mozart, (Messiah), Handel. Act II. Also, a Grand Manuscript Concerto for Violins, Tenor, Violoncello, Two Oboes, Two Clarinets, Two Bassoons, and Four French Horns; composed by Handel for his Patron Mr. Jennings and supposed never to have been publicly performed in London. The Parts are in the handwriting of the late M. J. C. Smith of Bath, who was Handel’s amanuensis after he became blind.

*British Press*, April 26, 1805; *London Courier and Evening Gazette*, April 27, 1805; *Morning Post*, April 27, 1805; *Morning Chronicle*, April 29, 1805.

June 25-27, 1805. Theatre, Oxford—Grand Musical Festival. On Tuesday, the Sacred Oratorio of The Messiah; on Wednesday and Thursday, Two Grand Miscellaneous Concerts. Principal Vocal Performers already engaged, Signora Storace, Mrs. Ashe, Leader of the Band, Mr. Cramer, Violins, Messrs. Moralt, Marshall, Mahon, Clarionets, Messrs. Haldon.

*British Press*, May 16, 1805; *Morning Chronicle*, May 17, 1805; *Oxford Journal*, June 1, 15, 22, 1805; *London* *Courier and Evening Gazette*, June 11, 1805; *Star*, June 17, 1805; *Morning Post*, June 19, 1805.

August 14-16, 1805. Portsmouth and Portsea Grand Musical Festival will consist of Five Performances. Also the following distinguished Instrumental Performers from the Opera Band, &c., Mr. Lindley, Principal Violoncello, Mr. W. Mahon Principal Clarinet and second Violin.

*Star*, June 14, August 3, 1805; *Sun*, August 3, 1805; *Hampshire Telegraph and Sussex Chronicle*, July 1, 1805; August 5, 12, 1805.

September 11-13, 1805. Gloucester Music-Meeting. The Meeting of the Three Choirs of Gloucester for the Benefit of the Widows and Orphans of the Poor Clergy of the Three Dioceses, with be held at Gloucester on Wednesday. Mr. R. [Wm.] Mahon, Principal Clarionet.

*Gloucester Journal*, July 1, 15, 29, 1805; *Oxford Journal*, August 10, 22, 1805.

October 2-6, 1805. Birmingham Musical Festival. For the Benefit of the General Hospital. St. Philip’s Church. Grand Miscellaneous Concerts. Instrumental Performers, Oboe—Mr. [William] Mahon, Clarionet, Mr. [John] Mahon.

*Morning Chronicle*, August 23, 1805; *Manchester Mercury*, August 27; September 24, 1805; *Derby Mercury*, August 29, 1805; *Oxford Journal*, September 14, 1805; *Staffordshire Advertiser*, September 14, 21, 28, 1805; *Bath Chronicle and Weekly Gazette*, September 19, 26, 1805.

November 28, 1805. Concert, At the New Rooms, Salisbury on Thursday. Messrs. Lacy, Harrington, and Goss respectfully inform the Nobility, Gentry, and the Public that they intend having a Vocal Concert on the above evening. Principal Instrumental Performers: Mr. W. Mahon who will introduce a Clarionet Piece; Messrs. Lucas, Holloway, Clarke, C. Lacy, &c. Mr. A. Corfe will preside at the Piano Forte.

*Salisbury and Winchester Journal*, November 25, 1805.

February 14, 1806. New Rooms, Hanover Square. Vocal Concert. Harrison, Bartleman and Greatorex, one in a series of 9 concerts. Principal Instrumental Performers, Clarinets, Messrs. Mahon and Oliver.

*Morning Post*, January 28, 1806.

April 2, 1806. King’s Theatre. Mr. Harrison’s Annual Concert in the Great Room. The Orchestra will consist of one hundred select performers. Leader of the Band, Mr. Weichsel. Act II. Grand Concertante, (MS.) for Violin, Viola Violoncello, Oboe, Clarinet, and Bassoon; Messrs. Weichsel, Shield, Linley, Ling, Cramer, and Holmes—Winter.

*Morning Chronicle*, April 30, 1806.

May 21, 1806. Great Rooms, King’s Theatre, Haymarket.—Mr. Salomon’s Annual Concert, Wednesday next. Part I. Concerto Clarinet, Mr. Kramer.

*Morning Chronicle*, May 16, 21, 1806.

September 7-9, 1808. Gloucester Music Meeting. The Meeting of the Three Choirs of Gloucester, Worcester, and Hereford, is appointed to be held at Gloucester on Wednesday and the two succeeding days. Principal vocal performers: Mrs. Billington, Mrs. Vaughan; Principal Instrumental Performers: Leader of the Band, Mr. F. Cramer, Mr. Mahon. [September 1: Mr. R. [J.] Mahon, Principal Clarionet.]

*Gloucester Journal*, May 30, 1808; *Bath Chronicle and Weekly Gazette*, August 11, 1808; *Worcester Journal*, August 11, 25, September 1, 1808; *Oxford University and City Herald*, August 13, 1808.

September 21, 1811. Assembly-Rooms, Cheltenham. Madame Catalani’s second performance will be at the above rooms on Saturday morning next which will be given a grand concert of vocal and instrumental music. Principal instrumental performers. Violins, Messrs. Marshall (Leader), [Wm.] Mahon, Clarionets—Messrs. [John] Mahon and Oliver.

*Cheltenham Chronicle*, September 19, 1811.

November 14, 1811. Theatre, Salisbury, Grand Concert. T. Harrington respectfully announces to the nobility and gentry, his friends, and the public in general, he intends having a Concert of Vocal and Instrumental Music, at the Theatre, on Thursday evening, and respectfully solicits the honour of their patronage on the occasion. Part II Clarionet Concert, Mr. Mahon, Mahon. Leader of the Band, W. Mahon, from the Opera.

*Salisbury and Winchester Journal*, November 11, 1811.

December 12, 1811. For the Benefit of The Salisbury Infirmary. The Public are respectfully informed, that there will be a Grand Concert of Vocal and Instrumental Music, at the Assembly-Rooms, on Thursday, the Profits of which will be applied to the Support of that Excellent Institution. The Second Act will be Miscellaneous, Mr. Mahon will play a Concerto on the Clarionet. Leader of the Band, Mr. [Wm.] Mahon (violin).

*Salisbury and Winchester Journal*, December 2, 1811.

May 26, 1812. Salisbury. Concert and Ball. Assembly Rooms. Mrs. Harrington respectfully announces to the Ladies and Gentlemen of Salisbury and its vicinity, she intends having a Concert of Vocal and Instrumental Music, at the above Rooms, on Tuesday evening, and hopes for the honour of their patronage. Principal Instrumental Performers, Leader of the Band, Mr. Sharpe, from London; Second Violin, Mr. J. Mahon. Concertante Messrs. Sharpe, [Wm.] Mahon, Clarke, and Lucas, Pleyel.

*Salisbury and Winchester Journal*, May 25, 1812.

June 22-25, 1813. The Fourth Bath and Somersetshire Grand Musical Festival will be celebrated at the Abbey Church, & Lower Assembly-Rooms. Miscellaneous Concert (June 23, 1813), Madame Catalani-Mr. W. Mahon will play a Concerto on the Clarionet; and Master Field, a Concerto on the Piano-Forte.

*Bath Chronicle and Weekly Gazette*, May 27, June 10, 1813; *Bristol Mirror*, May 29, 1813; *Taunton Courier, and Western Advertiser*, June 17, 1813.

April 18-22, 1814. The Fifth Bath and Somersetshire Grand Musical Festival will be celebrated at the Abbey-Church and New Assembly Rooms on April 18 at the Rooms, A Grand Miscellaneous Concert. Tuesday at the Church, Wednesday at the Church, a Selection from the Creation, (by Haydn); Thursday at the Church, Friday at the Church will be performed the Sacred Oratorio of the Messiah. Principal Vocal Performers: Madame Catalani, Miss Wood and Mrs. Salmon; Leader of the Band, Mr. Loder, Clarionet, Mr. [Wm.] Mahon.

*Bath Chronicle and Weekly Gazette*, March 17, 24, 31; April 9, 14, 1814; *Bristol Mirror*, April 9, 12, 14, 1814; *Bristol Times and Mirror*, May 14, 16, 1814.

May 3, 1816. Obituary. At Salisbury, aged 63, Mr. Wm. Mahon late of the opera band, who, with his brothers, have long been esteemed the most celebrated performers upon the clarinet in Europe.

*The European Magazine and London Review* 69 (January-June 1816).

On Friday the 3d inst. [May] died, at the house of his brother in law, Joseph Tanner, Esq. Salisbury, Mr. William Mahon, aged 65 years. His abilities in the musical line had long rendered him one of the greatest ornaments of the profession. He was formerly a respectable Member of our Music Room Orchestra, and led the Concerts in Salisbury above thirty years, with great credit. His eminent talents were duly appreciated at the Opera House, where he was many years engaged, and judged, to be the first performer on the Clarionet in England. Nor was he less esteemed for his virtues. The goodness of his heart endeared him to all who knew him; the mildness of his manners, his sincerity, strict integrity, and generosity, procured him the respect and attachment of a numerous circle of friends.

*Oxford Journal*, May 11, 1816; *Oxford University and City Herald*, May 11, 1816.

May 3, 1816. At Wm. Tanner’s Esq. Salisbury, Mr. Wm Mahon, late of the Opera Band. *The Suffolk Chronicle; or Weekly General Advertiser & County Express*, May 11, 1816.

May 3, 1816. Obituary. On Thursday, se’nnight, at Wm. Tanner, Esq.’s, Salisbury, aged 63, Mr. Wm Mahon, late of the Opera Band, who, with his brothers, have long been esteemed the most celebrated performers upon the clarionet in Europe.

*Staffordshire Advertiser,* May 1816; *Cumberland Pacquet, and Ware's Whitehaven Advertiser*, May 14, 1816.

May 3, 1816. “Obituary; with Anecdotes of remarkable Persons,” At his brother-in-law’s, Joseph Tanner, esq. Salisbury, aged 65, Mr. W. Mahon. He was a native of Oxford, and his celebrity in the musical profession had long rendered him one of its greatest ornaments. He was leader of the concerts in Salisbury upwards of 30 years, and his eminent talents were duly appreciated at the Opera House, where he had been many years engaged, and was esteemed the first performer on the clarionet in England. His scientific knowledge, and fine execution on the violin and other instruments, were also of the first description. Nor was he less esteemed for his virtues. The goodness of his heart endeared him to all who knew him; and the mildness of his manners, his sincerity, strict integrity, and generosity, procured him the respect and attachment of a numerous circle of friends.

*The Gentleman’s Magazine*, June 4, 1816, 567.
